# Supplementary material
Source: HighWire-hosted journal article supplement (https://bmjopen.bmj.com/content/11/5/e046367)
Supplement: inline-supplementary-material-1 [file inline-supplementary-material-1.pdf]

**Appendix A - Search Strategy (MEDLINE)**

Database: Ovid MEDLINE, Ahead of Print, In-Process & Other Non-Indexed Citations and Daily <March 1 2014 to March 1 2019>

|     |                                                                                                                                                                                                                                                                                                                                                                                                                                                                                                                                                                                                                                                                                                                                                                                                                          |
|-----|--------------------------------------------------------------------------------------------------------------------------------------------------------------------------------------------------------------------------------------------------------------------------------------------------------------------------------------------------------------------------------------------------------------------------------------------------------------------------------------------------------------------------------------------------------------------------------------------------------------------------------------------------------------------------------------------------------------------------------------------------------------------------------------------------------------------------|
| 30  | (infant* or infancy or baby or babies or newborn* or new born* or neonat* or toddler* or preschooler* or child* or boy or boys or girl or girls or pediatric* or preteen or adolescen* or youth or teen or teens or teenager*).ti,ab,kw. or exp infant/ or exp child/ or adolescent/                                                                                                                                                                                                                                                                                                                                                                                                                                                                                                                                     |
| 31  | (Screen time or Screentime or Screen viewing or Screen usage or "screen use" or "screen media use" or "screen digital media use").ti,ab,kw. or screen time/                                                                                                                                                                                                                                                                                                                                                                                                                                                                                                                                                                                                                                                              |
| 32* | ((Digital media or Digital activity or Screen media or Electronic media or interactive media or Cell phone* or cellphone* or Smartphone* or Smart phone* or Tablet* or Ipad or I pad or mobile device* or Mobile technology or Digital technology or Mobile phone* or I phone* or Iphone* or Television* or Tv or Dvd or dvds or youtube or Netflix or Instagram or facebook or snapchat or hulu or Social media or screen media or Smart device* or Digital device* or Videogame* or video game* or Video gaming or Video console* or Xbox or X box or Playstation or Wii or Nintendo or Video streaming or virtual reality or augmented reality or Web browsing or internet or computer* or handheld or laptop* or electronic gam*) adj2 ("use" or usage or overuse or view* or watch or play* or exposure)).ti,ab,kw. |

## Measurement of Digital Media: A Scoping Review

2

|    |                                                                                                                                                                                                                                                                                                                                                                                                                                                             |
|----|-------------------------------------------------------------------------------------------------------------------------------------------------------------------------------------------------------------------------------------------------------------------------------------------------------------------------------------------------------------------------------------------------------------------------------------------------------------|
| 33 | (time or frequency or hour or hours or daily or week or day or monitor or monitoring).ti,ab,kw. or time factors/                                                                                                                                                                                                                                                                                                                                            |
| 34 | 32 and 33                                                                                                                                                                                                                                                                                                                                                                                                                                                   |
| 35 | (measurement or measuring or measure or assessment* or screening or scale or scales or inventory or tool or tools or test or tests or poll or polls or polling or survey* or questionnaire* or interview* or self report* or child report* or parent report* or teaching report* or recording or monitor or monitoring or naturalistic or observational stud* or observational method* or nationally representative sample or probability sample).ti,ab,kw. |
| 36 | "surveys and questionnaires"/ or Self report/ or Interviews as topic/ or observational studies as topic/ or Observational study.pt.                                                                                                                                                                                                                                                                                                                         |
| 37 | 35 or 36                                                                                                                                                                                                                                                                                                                                                                                                                                                    |
| 38 | 31 or 34                                                                                                                                                                                                                                                                                                                                                                                                                                                    |
| 39 | 30 and 37 and 38                                                                                                                                                                                                                                                                                                                                                                                                                                            |
| 40 | limit 39 to english language                                                                                                                                                                                                                                                                                                                                                                                                                                |
| 41 | 40 not (review or editorial or letter or comment).pt.                                                                                                                                                                                                                                                                                                                                                                                                       |
| 42 | 41 not (exp animals/ not humans/)+                                                                                                                                                                                                                                                                                                                                                                                                                          |
| 43 | limit 42 to yr="2007 -Current"                                                                                                                                                                                                                                                                                                                                                                                                                              |
| 44 | limit 42 to yr="2014 -Current"                                                                                                                                                                                                                                                                                                                                                                                                                              |

## Measurement of Digital Media: A Scoping Review

3

\* Because the MeSH heading “screen time” has only been in use since 2019, we have created a keyword search strategy to capture articles in which researchers assess the time spent on digital media use without using the phrase “screen time”.
