# Supplementary material
Source: HighWire-hosted journal article supplement (https://bmjopen.bmj.com/content/11/5/e046367)
Supplement: inline-supplementary-material-2 [file inline-supplementary-material-2.pdf]

## Measurement of Digital Media: A Scoping Review

1

## Appendix B – Database Sources

Table 1. Study Characteristics – Database Sources

| Measurement Tool                                | Acronym      | Source # | Authors (Year)                                    | Study Setting       | Total Sample Size | Sample Age Group(s)                       | Race                | SES - Index                         | Study Paradigm                | Risk of Bias | Notes                                                                   |
|-------------------------------------------------|--------------|----------|---------------------------------------------------|---------------------|-------------------|-------------------------------------------|---------------------|-------------------------------------|-------------------------------|--------------|-------------------------------------------------------------------------|
| Addiction Profile Index Internet Addiction Form | APIINT       | 1        | Ogel, Karadag, Satgan & Koc (2015)                | Unknown             | 154               | Adolescence<br>Young Adults               | Unknown             | Not Specified                       | Survey (local)                | High         |                                                                         |
| Adolescent Health Promotion Short Form          | AHP-SF       | 2        | Chen, Lai & Gaete (2014)                          | School              | 814               | Adolescence<br>Young Adults               | Unknown             | Not Specified                       | Survey (local)                | Low          |                                                                         |
| Adolescent Preoccupation with Screens Scale     | APSS         | 3        | Hunter et al. (2017)                              | Online              | 1952              | School Age<br>Adolescence                 | Unknown             | Diverse SES -<br>Common Index       | Survey (local)                | Low          |                                                                         |
| Battery Use Screenshot                          | BUS          | 4        | Gower & Moreno (2018)                             | Online              | 1156              | School Age<br>Adolescence                 | Unknown             | Not Specified                       | Survey (local)                | Low          |                                                                         |
| Behavioral Addiction Measure Video Gaming       | BAM-<br>VG   | 5        | Sanders & Williams (2016)                         | Online              | 506               | Young Adults                              | Unknown             | Diverse SES -<br>Common Index       | Survey (local)                | Low          | Target<br>Population:<br>People who<br>play video<br>games<br>regularly |
| Bergen Facebook Addiction Scale                 | BFAS         | 6        | Pontes, Andreassen & Griffiths (2016)             | School &<br>Online  | 495               | Adolescence<br>Young Adults               | Unknown             | Not Specified                       | Survey (local)                | Low          |                                                                         |
| Bergen Social Media Addiction Scale             | BSMAS        | 7a       | Lin, Broström, Nilsen, Griffiths & Pakpour (2017) | School              | 2676              | Adolescence<br>Young Adults               | Unknown             | Not Specified                       | Survey (local)                | Low          |                                                                         |
|                                                 |              | 8        | Monacis, de Palo, Griffiths, & Sinatra (2017)     | School              | 734               | Adolescence<br>Young Adults               | Unknown             | Not Specified                       | Survey (local)                | Low          |                                                                         |
| Chen Internet Addiction Scale - Revised         | CIAS-R       | 9a       | Mak et al. (2014)                                 | School              | 860               | Adolescence<br>Young Adults               | 100% East Asian     | Not Specified                       | Survey (local)                | Moderate     |                                                                         |
| Chinese Social Media Addiction Scale            |              | 10       | Liu & Ma (2018)                                   | School              | 619               | Adolescence<br>Young Adults               | 100% East Asian     | Not Specified                       | Survey (local)                | Moderate     | Target<br>Population:<br>Chinese<br>Youth                               |
| Clinical Video game Addiction Test 2.0          | C-VAT<br>2.0 | 11       | van Rooij, Schoenmakers & van de Mheen (2015)     | Clinic              | 32                | School Age<br>Adolescence<br>Young Adults | Unknown             | Not Specified                       | Survey (local)                | Low          |                                                                         |
| Compulsive Internet Use Scale                   | CIUS         | 12a      | Dhir, Chen & Nieminen (2015a)                     | School              | 425               | Adolescence<br>Young Adults               | 100% East Asian     | Diverse SES -<br>Author's Scale     | Survey (local)                | Low          |                                                                         |
|                                                 |              | 13       | Dhir, Chen & Nieminen (2015b)                     | School              | 3693              | School Age<br>Adolescence<br>Young Adults | 100% South<br>Asian | Diverse SES -<br>Author's Scale     | Survey (local)                | Low          |                                                                         |
|                                                 |              | 14       | Dhir, Chen & Nieminen (2016)                      | School              | 2383              | School Age<br>Adolescence<br>Young Adults | 100% South<br>Asian | High/Middle SES<br>- Author's Scale | Survey (local)                | High         |                                                                         |
|                                                 |              | 15       | Guertler et al. (2014a)                           | In-Home             | 8132              | Adolescence<br>Young Adults               | Unknown             | Not Specified                       | Survey (local)                | Low          |                                                                         |
|                                                 |              | 16       | Guertler et al. (2014b)                           | Clinic &<br>In-Home | 292               | Adolescence<br>Young Adults               | 91% White           | Not Specified                       | Survey (local) &<br>Interview | Low          |                                                                         |

## Measurement of Digital Media: A Scoping Review

2

|                                                       |        |     |                                                                   |                                 |       |                                           |                           |                              |                                          |          |                                    |
|-------------------------------------------------------|--------|-----|-------------------------------------------------------------------|---------------------------------|-------|-------------------------------------------|---------------------------|------------------------------|------------------------------------------|----------|------------------------------------|
|                                                       |        | 17b | Jeromin, Rief & Barke (2016)                                      | Online                          | 894   | Young Adults                              | Unknown                   | Not Specified                | Survey (local)                           | Low      | Target Population: Internet Gamers |
|                                                       |        | 18b | Siciliano, Bastiani, Mezzasalma, Thanki, Curzio & Molinaro (2015) | School                          | 21205 | Adolescence<br>Young Adults               | Unknown                   | Not Specified                | Secondary Data Analysis, National Survey | Low      |                                    |
|                                                       |        | 19  | Yong, Inoue & Kawakami (2017)                                     | Online                          | 623   | Adolescence<br>Young Adults               | Unknown                   | Not Specified                | Survey (local)                           | Low      |                                    |
|                                                       |        | 20  | Wartberg, Petersen, Kammerl, Rosenkranz & Thomasius (2014)        | Unknown                         | 1723  | Adolescence                               | Unknown                   | Not Specified                | Survey (local) & Interview               | Low      |                                    |
| Content-based Media Exposure Scale                    | C-ME   | 21  | den Hamer, Konijn, Plaisier, Keijer, Krabbendam & Bushman (2017)  | School                          | 2164  | School Age<br>Adolescence<br>Young Adults | Unknown                   | Diverse SES - Author's Scale | Survey (local)                           | Low      |                                    |
| Diagnostic Classification Test for Internet Addiction | DCT-IA | 22  | Tu, Gao, Wang & Cai (2017)                                        | Unknown                         | 1558  | School Age<br>Adolescence<br>Young Adults | Unknown                   | Not Specified                | Unknown/Unclear                          | Moderate |                                    |
| Excessive Internet Use Scale                          | EIU    | 23  | Škařupová, Ólafsson & Blinka (2015)                               | Online                          | 18709 | Adolescence                               | Unknown                   | Not Specified                | Secondary Data Analysis, National Survey | Low      |                                    |
| Food, Health, and Choices Questionnaire               | FHC-Q  | 24  | Gray, Koch, Contento, Bandelli, Ang & Noia (2016)                 | School                          | 221   | School Age                                | 69% Hispanic<br>27% Black | Low SES - Author's Scale     | Survey (local)                           | Low      |                                    |
| Game Addiction Identification Test                    | GAIT   | 25  | Vadlin, Aslund, Rehn & Nilsson (2015)                             | Online & Unknown (Paper survey) | 1877  | Adolescence                               | Unknown                   | Diverse SES - Common Index   | Survey (local)                           | Low      |                                    |
|                                                       |        | 26  | Gaetan, Bonnet, Brejard & Cury (2014)                             | Online & School                 | 465   | School Age<br>Adolescence<br>Young Adults | Unknown                   | Not Specified                | Survey (local)                           | Low      |                                    |
| Game Addiction Scale                                  | GAS    | 27  | Lemos, Cardoso & Sougey (2016)                                    | School                          | 384   | Young Adults                              | Unknown                   | Not Specified                | Survey (local)                           | Low      | Target Population: Gamers          |
|                                                       |        | 28  | Brunborg, Hanss, Mentzoni, & Pallesen (2015)                      | In-Home & Online                | 3037  | Adolescence<br>Young Adults               | Unknown                   | Not Specified                | National Survey                          | Low      |                                    |
|                                                       |        | 29  | Sahin, Gumus & Dincel (2016)                                      | Online                          | 370   | Adolescence<br>Young Adults               | Unknown                   | Not Specified                | Survey (local)                           | Low      |                                    |
| Generalized Problematic Internet Use Scale 2          | GPIU2  | 30  | Assunção & Matos (2017)                                           | School                          | 761   | Adolescence<br>Young Adults               | Unknown                   | Diverse SES - Common Index   | Survey (local)                           | Low      |                                    |
|                                                       |        | 31  | Pontes, Caplan & Griffiths (2016)                                 | Online                          | 622   | School Age<br>Adolescence<br>Young Adults | Unknown                   | Not Specified                | Survey (local)                           | Low      |                                    |
|                                                       |        | 32a | Laconi, Kaliszewska-Czeremska, Tricard, Chabrol & Kuss (2018)     | School & Online                 | 563   | Young Adults                              | Unknown                   | Not Specified                | Survey (local)                           | Moderate |                                    |

## Measurement of Digital Media: A Scoping Review

3

|                                              |      |     |                                                                                   |                                         |      |                                     |                                            |                                  |                 |          |                                                                                                  |
|----------------------------------------------|------|-----|-----------------------------------------------------------------------------------|-----------------------------------------|------|-------------------------------------|--------------------------------------------|----------------------------------|-----------------|----------|--------------------------------------------------------------------------------------------------|
| Healthy Computing Questionnaire for Children | HCQC | 33  | Hatfield, Parsons, Ciccarelli (2016)                                              | School                                  | 440  | School Age                          | Unknown                                    | Not Specified                    | Survey (local)  | High     |                                                                                                  |
| Healthy Living for Kids Survey               | HLKS | 34  | Quelly (2018)                                                                     | School                                  | 88   | School Age                          | 66% White<br>12% Hispanic<br>9% Mixed Race | Not Specified                    | Survey (local)  | High     |                                                                                                  |
| Implicit Association Test                    |      | 35  | Roh, Bhang, Choi, Kweon, Lee & Potenza (2018)                                     | Clinic & Hospital Based Research Centre | 78   | School Age Adolescence              | 100% East Asian                            | Not Specified                    | Survey (local)  | Low      | Target Population: Treatment-seeking children with Internet addiction and/or smart-phone overuse |
| Internet Abusive Use Questionnaire           | IAUQ | 36  | Calvo-Francés (2016)                                                              | Online                                  | 908  | Adolescence Young Adults            | Unknown                                    | Not Specified                    | National Survey | Low      |                                                                                                  |
| Internet Addiction Diagnostic Questionnaire  | IADQ | 37a | Boysan, Kuss, Barut, Ayköse, Güleç & Özdemir (2015)                               | School                                  | 455  | Young Adults                        | Unknown                                    | High/Middle SES - Author's Scale | Survey (local)  | High     |                                                                                                  |
| Internet Addiction Scale                     | IAS  | 41  | Cho et al. (2014)                                                                 | School                                  | 1192 | Adolescence                         | Unknown                                    | Diverse SES - Author's Scale     | Survey (local)  | Moderate |                                                                                                  |
|                                              |      | 9b  | Mak et al. (2014)                                                                 | School                                  | 860  | Adolescence Young Adults            | 100% East Asian                            | Not Specified                    | Survey (local)  | Moderate |                                                                                                  |
|                                              |      | 12b | Dhir, Chen & Nieminen (2015a)                                                     | School                                  | 425  | Adolescence Young Adults            | 100% East Asian                            | Diverse SES - Author's Scale     | Survey (local)  | Low      |                                                                                                  |
|                                              |      | 32b | Laconi, Kaliszewska-Czeremska, Tricard, Chabrol & Kuss (2018)                     | School & Online                         | 563  | Young Adults                        | Unknown                                    | Not Specified                    | Survey (local)  | High     |                                                                                                  |
|                                              |      | 37b | Boysan, Kuss, Barut, Ayköse, Güleç & Özdemir (2015)                               | School                                  | 455  | Young Adults                        | Unknown                                    | High/Middle SES - Author's Scale | Survey (local)  | High     |                                                                                                  |
|                                              |      | 38  | Ahmad, Alzayyat, Al-Gamal (2015)                                                  | School                                  | 587  | Adolescence Young Adults            | Unknown                                    | Diverse SES - Author's Scale     | Survey (local)  | Low      |                                                                                                  |
| Internet Addiction Test                      | IAT  | 39b | Baggio, Iglesias, Berchtold & Suris (2017)                                        | School & Online                         | 3067 | Adolescence                         | Unknown                                    | High/Middle SES - Author's Scale | National Survey | Low      |                                                                                                  |
|                                              |      | 40a | Chin & Leung (2018)                                                               | School                                  | 1072 | School Age Adolescence Young Adults | Unknown                                    | Not Specified                    | Survey (local)  | Low      |                                                                                                  |
|                                              |      | 42  | Dhir, Chen & Nieminen (2015c)                                                     | School                                  | 1914 | School Age Adolescence Young Adults | 100% South Asian                           | Not Specified                    | Survey (local)  | Moderate |                                                                                                  |
|                                              |      | 43  | Fernández-Villa, Molina, García-Martín, Llorca, Delgado-Rodríguez & Martín (2015) | Online                                  | 981  | Young Adults                        | Unknown                                    | Not Specified                    | Survey (local)  | Low      |                                                                                                  |
|                                              |      | 44  | Fioravanti & Casale (2015)                                                        | School                                  | 840  | Adolescence Young Adults            | Unknown                                    | Not Specified                    | Survey (local)  | Low      |                                                                                                  |
|                                              |      | 45  | Lai et al. (2015)                                                                 | School                                  | 2535 | School Age                          | 62% East Asian                             | Not Specified                    | National Survey | High     |                                                                                                  |

## Measurement of Digital Media: A Scoping Review

4

|                                                |               |     |                                                                     |                            |                             |                                           |                         |                                 |                |      |                                 |
|------------------------------------------------|---------------|-----|---------------------------------------------------------------------|----------------------------|-----------------------------|-------------------------------------------|-------------------------|---------------------------------|----------------|------|---------------------------------|
|                                                |               |     |                                                                     |                            | Adolescence<br>Young Adults | 38% Southeast<br>Asian                    |                         |                                 |                |      |                                 |
|                                                |               | 46  | Hawi, Blachnio & Przepiorka (2015)                                  | Online                     | 1297                        | School Age<br>Adolescence<br>Young Adults | Unknown                 | Not Specified                   | Survey (local) | High |                                 |
|                                                |               | 47  | Kaya, Delen & Young (2016)                                          | School                     | 990                         | Adolescence<br>Young Adults               | Unknown                 | Not Specified                   | Survey (local) | Low  |                                 |
|                                                |               | 48  | Monacis, de Palo, Griffiths, & Sinatra (2016)                       | School,<br>Gaming<br>halls | 687                         | Adolescence<br>Young Adults               | Unknown                 | Not Specified                   | Survey (local) | Low  |                                 |
|                                                |               | 49  | Pontes, Patrão & Griffiths (2014)                                   | School &<br>Online         | 593                         | Adolescence<br>Young Adults               | 94% White               | Not Specified                   | Survey (local) | Low  |                                 |
|                                                |               | 50  | Tsimtsiou, Haidich, Kokkali, Dardavesis, Young & Arvanitidou (2014) | School                     | 151                         | Young Adults                              | Unknown                 | Not Specified                   | Survey (local) | High |                                 |
|                                                |               | 51  | Waqas et al. (2018)                                                 | School                     | 522                         | Adolescence<br>Young Adults               | 100% South<br>Asian     | Not Specified                   | Survey (local) | Low  |                                 |
|                                                | IAT-A         | 52  | Teo & Kam (2014)                                                    | School &<br>Online         | 325                         | School Age<br>Adolescence                 | Unknown                 | Not Specified                   | Survey (local) | Low  |                                 |
|                                                | s-IAT-<br>sex | 53  | Wéry, Burnay & Billieux (2015)                                      | Online                     | 401                         | Young Adults                              | Unknown                 | Not Specified                   | Survey (local) | Low  |                                 |
| Internet Addiction Test -<br>Short Version     | s-IAT         | 54  | Tran et al. (2017)                                                  | Online                     | 589                         | Adolescence<br>Young Adults               | 100% Southeast<br>Asian | Diverse SES -<br>Author's Scale | Survey (local) | Low  |                                 |
| Internet Disorder Scale                        | IDS-15        | 55  | Pontes & Griffiths (2017)                                           | Online                     | 1094                        | Adolescence<br>Young Adults               | Unknown                 | Not Specified                   | Survey (local) | Low  |                                 |
| Internet Gaming Disorder<br>Questionnaire      | IGDQ          | 17a | Jeromin, Rief & Barke (2016)                                        | Online                     | 894                         | Young Adults                              | Unknown                 | Not Specified                   | Survey (local) | Low  |                                 |
|                                                |               | 56c | Evren, Dalbudakb, Topcu, Kutlu, Evren & Pontes (2018)               | Online                     | 1250                        | Young Adults                              | Unknown                 | Not Specified                   | Survey (local) | Low  |                                 |
| Internet Gaming Disorder<br>Scale              | IGDS          | 57  | Lemmens, Valkenburg & Gentile (2015)                                | Online                     | 2444                        | Adolescence<br>Young Adults               | Unknown                 | Not Specified                   | Survey (local) | Low  |                                 |
|                                                |               | 58  | Wartberg, Ziegelmeier & Kammerl (2019)                              | In-Home                    | 985                         | School Age<br>Adolescence                 | Unknown                 | Not Specified                   | Survey (local) | Low  |                                 |
|                                                |               | 7b  | Lin, Broström, Nilsen, Griffiths & Pakpour (2017)                   | School                     | 2676                        | Adolescence<br>Young Adults               | Unknown                 | Not Specified                   | Survey (local) | Low  |                                 |
|                                                |               | 56a | Evren, Dalbudakb, Topcu, Kutlu, Evren & Pontes (2018)               | Online                     | 1250                        | Young Adults                              | Unknown                 | Not Specified                   | Survey (local) | Low  |                                 |
| Internet Gaming Disorder<br>Scale - Short Form | IGDS9-<br>SF  | 59  | Pontes & Griffiths (2015)                                           | Online                     | 1060                        | Adolescence<br>Young Adults               | Unknown                 | Not Specified                   | Survey (local) | Low  | Target<br>Population:<br>Gamers |
|                                                |               | 60  | Wu, Lin, Årestedt, Griffiths, Broström & Pakpour (2017)             | School                     | 2363                        | School Age<br>Adolescence<br>Young Adults | 100% Middle<br>Eastern  | Not Specified                   | Survey (local) | Low  |                                 |
|                                                |               | 61  | Schivinski, Brzozowska-Woś, Buchanan, Griffiths & Pontes (2018)     | Online                     | 3222                        | School Age<br>Adolescence<br>Young Adults | Unknown                 | Not Specified                   | Survey (local) | Low  |                                 |

## Measurement of Digital Media: A Scoping Review

5

|                                                |          |     |                                                                    |                  |      |                                     |                  |                       |                              |          |
|------------------------------------------------|----------|-----|--------------------------------------------------------------------|------------------|------|-------------------------------------|------------------|-----------------------|------------------------------|----------|
|                                                |          | 62  | Pontes & Griffiths (2016)                                          | School & Online  | 495  | School Age Adolescence Young Adults | Unknown          | Not Specified         | Survey (local)               | Low      |
|                                                |          | 63  | Pontes, Macur & Griffiths (2016)                                   | School           | 1071 | School Age Adolescence              | Unknown          | Not Specified         | Survey (local)               | Low      |
| Internet Gaming Disorder Test 10               | IGDT-10  | 65a | Király, Slecza, Pontes, Urbán, Griffiths & Demetrovics (2017)      | Online           | 4887 | Adolescence Young Adults            | Unknown          | Not Specified         | Survey (local)               | Moderate |
|                                                |          | 64  | Hawi & Samaha (2017)                                               | School           | 375  | Adolescence Young Adults            | Unknown          | Not Specified         | Survey (local)               | Moderate |
| Internet Gaming Disorder Test 20               | IGD-20   | 66  | Pontes, Kiraly, Demetrovics & Griffiths (2014)                     | Online           | 1003 | Adolescence Young Adults            | Unknown          | Not Specified         | Survey (local)               | Low      |
|                                                |          | 67  | Fuster, Carbonell, Pontes & Griffiths (2016)                       | Online           | 1074 | School Age Adolescence Young Adults | Unknown          | Not Specified         | Survey (local)               | High     |
| Internet Gratification Scale for Adolescents   |          | 68  | Dühr, Chen & Nieminen (2017)                                       | School           | 1914 | School Age Adolescence Young Adults | 100% South Asian | Diverse SES - Unknown | Survey (local)               | Low      |
| Internet Motive Questionnaire for Adolescents  | IMQ-A    | 69  | Bischof-Kastner, Kuntsche & Wolstein (2014)                        | In-Home & School | 101  | Adolescence Young Adults            | Unknown          | Not Specified         | Survey (local)               | Low      |
| Korean Scale for Internet Addiction            | K-Scale  | 70  | Mak et al. (2017)                                                  | School           | 589  | Adolescence Young Adults            | 100% East Asian  | Not Specified         | Survey (local)               | Moderate |
| Korean Smartphone Addiction Proneness Scale    |          | 71  | Kim, Lee, Lee, Nam & Chung (2014)                                  | Unknown          | 795  | School Age Adolescence Young Adults | Unknown          | Not Specified         | National Survey              | Low      |
| Media and Technology Usage and Attitudes Scale | MTUAS    | 72b | Cocoradă, Ioan Maican, Cazan & Maican (2018)                       | School           | 717  | Adolescence Young Adults            | Unknown          | Not Specified         | Survey (local)               | Low      |
| Mobile Phone Addiction Craving Scale           |          | 74a | De-Sola, Talledo, Rubio, & de Fonseca (2017)                       | Online           | 1126 | Adolescence Young Adults            | Unknown          | Not Specified         | National Survey              | Low      |
|                                                |          | 40b | Chin & Leung (2018)                                                | School           | 1072 | School Age Adolescence Young Adults | Unknown          | Not Specified         | Survey (local)               | Low      |
| Mobile Phone Dependence Questionnaire          | MPDQ     | 75  | Leung (2017)                                                       | School           | 733  | School Age Adolescence              | 100% East Asian  | Diverse SES - Unknown | Survey (local) & Focus Group | Moderate |
| Mobile Phone Involvement Questionnaire         |          | 76b | Lin, Griffiths & Pakpour (2018)                                    | School           | 3216 | Adolescence Young Adults            | Unknown          | High/Middle SES       | Survey (local)               | Low      |
|                                                |          | 74b | De-Sola, Talledo, Rubio, & de Fonseca (2017)                       | Online           | 1126 | Adolescence Young Adults            | Unknown          | Not Specified         | National Survey              | Low      |
| Mobile Phone Problem Use Scale                 | MPPUS    | 77a | Andrews, Ellis, Shaw & Piwek (2015)                                | In-Home          | 23   | Young Adults                        | Unknown          | Not Specified         | Survey (local)               | Low      |
|                                                |          | 78a | Lopez-Fernandez, Honrubia-Serrano, Freixa-Blanxart & Gibson (2014) | School           | 1529 | School Age Adolescence Young Adults | Unknown          | Not Specified         | Survey (local)               | Moderate |
| Mobile Phone Problem Use Scale - Short Form    | MPPUS-10 | 79  | Foerster, Roser, Schoeni & Rössli (2015)                           | School           | 412  | School Age Adolescence              | Unknown          | Not Specified         | Survey (local)               | Low      |
| Online Cognition Scale                         | OCS      | 80  | Blachnio, Przepiórka & Hawi (2015)                                 | Online           | 626  | School Age Adolescence              | Unknown          | Not Specified         | Survey (local)               | Low      |

## Measurement of Digital Media: A Scoping Review

6

|                                                                                                     |            | Young Adults |                                                               |                      |      |                                           |                                        |                              |                          |      |                                                                                              |
|-----------------------------------------------------------------------------------------------------|------------|--------------|---------------------------------------------------------------|----------------------|------|-------------------------------------------|----------------------------------------|------------------------------|--------------------------|------|----------------------------------------------------------------------------------------------|
|                                                                                                     |            | 81           | Komnenić, Filipović & Vukosavljević-Gvozden (2015)            | Online               | 254  | Adolescence<br>Young Adults               | Unknown                                | Not Specified                | Survey (local)           | High |                                                                                              |
| Online Gaming Addiction Scale                                                                       | OGAS       | 82           | Başol & Bedir Kaya (2018)                                     | Unknown              | 327  | Adolescence                               | Unknown                                | Not Specified                | Survey (local)           | Low  | Target Population: People who play MMORPGs (Massively Multiplayer Online Role Playing Games) |
| Out-Of-School Nutrition and Physical Activity - Observational Practice Assessment Tool              | OSNAP-OPAT | 83           | Lee et al. (2014)                                             | After-school program | 884  | School Age                                | Unknown                                | Not Specified                | Naturalistic Observation | High |                                                                                              |
| Parents Role in Establishing healthy Physical Activity and Sedentary behaviour habits questionnaire | PREPS      | 84           | Carson, Hesketh, Rhodes, Rinaldi, Rodgers & Spence (2017)     | Clinic & In-Home     | 118  | Infancy<br>Preschool Age                  | 58% White<br>15% East Asian            | Diverse SES                  | Survey (local)           | Low  | Target Population: Parents with ambulatory toddlers                                          |
| Persian Nomophobia Questionnaire                                                                    | NMP-Q      | 76a          | Lin, Griffiths & Pakpour (2018)                               | School               | 3216 | Adolescence<br>Young Adults               | Unknown                                | High/Middle SES              | Survey (local)           | Low  |                                                                                              |
| Problem Videogame Playing Scale                                                                     | PVP        | 85           | Tejeiro, Espada, González & Christiansen (2016)               | School               | 909  | School Age<br>Adolescence<br>Young Adults | Unknown                                | Not Specified                | Survey (local)           | Low  |                                                                                              |
|                                                                                                     |            | 78b          | Lopez-Fernandez, Honrubia-Serrano, Baguley & Griffiths (2014) | Unknown              | 2356 | School Age<br>Adolescence<br>Young Adults | Unknown                                | Not Specified                | Survey (local)           | Low  |                                                                                              |
| Problematic and Risky Internet Use Screening Scale                                                  | PRIUSS     | 87           | Moreno, Arseniev-Koehler & Selkie (2016)                      | School               | 1079 | Adolescence<br>Young Adults               | 82% White<br>8% East Asian<br>5% Black | Not Specified                | Survey (local)           | Low  |                                                                                              |
| Problematic Facebook Use Scale                                                                      | PFUS       | 88           | Marino, Vieno, Altoè & Spada (2017)                           | School               | 1460 | Adolescence<br>Young Adults               | Unknown                                | Not Specified                | Survey (local)           | Low  | Target Population: Facebook Users                                                            |
| Problematic Internet Entertainment Use Scale for Adolescents                                        | PIEUSA     | 78c          | Lopez-Fernandez, Honrubia-Serrano, Gibson & Griffiths (2014)  | School               | 1097 | School Age<br>Adolescence<br>Young Adults | Unknown                                | Not Specified                | Survey (local)           | Low  |                                                                                              |
| Problematic Internet Use Questionnaire                                                              | PIUQ       | 90           | El Asam, Samara & Terry (2019)                                | School               | 1814 | School Age<br>Adolescence                 | Unknown                                | Not Specified                | Survey (local)           | Low  |                                                                                              |
| Problematic Internet Use Questionnaire - Short Form                                                 | PIUQ-SF    | 91           | Li, Diez & Zhao (2019)                                        | School               | 235  | Adolescence<br>Young Adults               | 69% Black<br>27% Hispanic              | Not Specified - Common Index | Survey (local)           | High |                                                                                              |
| Problematic Internet Use Scale                                                                      | PIUS       | 92           | Boubeta, Salgado, Folgar, Gallego & Mallou (2015)             | School               | 1709 | School Age<br>Adolescence                 | 100% Hispanic                          | Not Specified                | Survey (local)           | High |                                                                                              |

## Measurement of Digital Media: A Scoping Review

7

|                                                    |          |      |                                                                                                |                       |       |                          |                 |                              |                                            |          |                                                               |
|----------------------------------------------------|----------|------|------------------------------------------------------------------------------------------------|-----------------------|-------|--------------------------|-----------------|------------------------------|--------------------------------------------|----------|---------------------------------------------------------------|
| Problematic Mobile Phone Use Questionnaire Revised | PMPU-Q-R | 93   | Kuss, Harkin, Kanjo & Billieux (2018)                                                          | Online & Focus Groups | 512   | Adolescence Young Adults | Unknown         | Not Specified                | Survey (local)                             | Moderate |                                                               |
|                                                    |          | 65b  | Király, Slecza, Pontes, Urbán, Griffiths & Demetrovics (2017)                                  | Online                | 4887  | Adolescence Young Adults | Unknown         | Not Specified                | Survey (local)                             | Moderate |                                                               |
| Problematic Online Gaming Questionnaire            | POGQ     | 94   | Smohai et al. (2017)                                                                           | School & Online       | 1964  | Adolescence              | Unknown         | Not Specified                | Survey (local)                             | Low      | Target Population: Individuals with problematic online gaming |
| Problematic Social Networking Services Use Scale   | PSUS     | 95   | Lou, Liu & Liu (2017)                                                                          | School                | 1030  | Adolescence Young Adults | Unknown         | Not Specified                | Survey (local)                             | High     |                                                               |
| Psycho-Social Aspects of Facebook Use              | PSAFU    | 96   | Bodroža & Jovanovic (2016)                                                                     | Online                | 804   | Adolescence Young Adults | Unknown         | Not Specified                | Survey (local)                             | High     |                                                               |
| Radio-Frequency Identification                     | RFID     | 97   | Alahmadi (2015)                                                                                | In-Home               | 7     | School Age               | Unknown         | Not Specified                | Naturalistic Observation                   | High     |                                                               |
| Risk of Addiction to Social Networks Scale         | CrARS    | 98   | Vilca & Vallejos (2015)                                                                        | School                | 205   | Adolescence Young Adults | Unknown         | Not Specified                | Survey (local)                             | Low      |                                                               |
| Sedentary Behaviour Questionnaires                 |          | 99   | Busschaert, De Bourdeaudhuij, Van Holle, Chastin, Cardon & De Cocker (2015)                    | In-Home & School      | 221   | Adolescence Young Adults | Unknown         | Diverse SES - Author's Scale | Survey (local) & Experience Sampling (EMA) | High     |                                                               |
| Short Problematic Internet Use Test                | SPIUT    | 18a  | Siciliano, Bastiani, Mezzasalma, Thanki, Curzio & Molinaro (2015)                              | School                | 21205 | Adolescence Young Adults | Unknown         | Not Specified                | Secondary Data Analysis, National Survey   | Low      |                                                               |
| Short Social Media Disorder Scale                  |          | 100b | van den Eijnden, Lemmens & Valkenburg (2016)                                                   | Online                | 2198  | School Age Adolescence   | Unknown         | Not Specified                | Survey (local)                             | Low      |                                                               |
|                                                    |          | 101  | Khoury, de Freitas, Roque, Rodrigues Albuquerque, de Castro Lourenço das Neves & Garcia (2017) | School                | 415   | Young Adults             | Unknown         | Not Specified                | Survey (local)                             | High     |                                                               |
| Smartphone Addiction Inventory                     | SPAI     | 102  | Pavia, Cavani, Di Blasi & Giordano (2016)                                                      | School                | 485   | Young Adults             | 100% White      | Not Specified                | Survey (local)                             | Low      |                                                               |
|                                                    |          | 103  | Simó-Sanz, Ballestar-Tarín & Martínez-Sabater (2018)                                           | Online                | 2958  | Adolescence Young Adults | Unknown         | Not Specified                | Survey (local)                             | Low      |                                                               |
|                                                    |          | 104  | Wang, Sigerson, Jiang & Cheng (2018)                                                           | School                | 463   | Young Adults             | 100% East Asian | Not Specified                | Survey (local)                             | Low      |                                                               |
|                                                    |          | 105  | Demirci, Orhan, Demirdas, Akpınar & Sert (2014)                                                | School                | 301   | Young Adults             | Unknown         | Not Specified                | Survey (local)                             | Low      |                                                               |
| Smartphone Addiction Scale                         | SAS      | 106a | Sfendla, Laita, Nejjar, Souirti, Touhami & Senhaji (2018)                                      | Online                | 750   | Adolescence Young Adults | Unknown         | Not Specified                | Survey (local)                             | Low      |                                                               |
| Smartphone Addiction Scale - Short Version         | SAS-SV   | 72a  | Cocoradă, Ioan Maica, Cazan & Maican (2018)                                                    | School                | 717   | Adolescence Young Adults | Unknown         | Not Specified                | Survey (local)                             | Low      |                                                               |

## Measurement of Digital Media: A Scoping Review

8

|                                                             |         |      |                                                           |                            |      |                                           |                             |                                  |                                     |          |                                                  |
|-------------------------------------------------------------|---------|------|-----------------------------------------------------------|----------------------------|------|-------------------------------------------|-----------------------------|----------------------------------|-------------------------------------|----------|--------------------------------------------------|
|                                                             |         | 106b | Sfendla, Laita, Nejjar, Souirti, Touhami & Senhaji (2018) | Online                     | 750  | Adolescence<br>Young Adults               | Unknown                     | Not Specified                    | Survey (local)                      | Low      |                                                  |
|                                                             |         | 107  | Luk et al. (2018)                                         | In-Home                    | 3211 | Young Adults                              | 100% East Asian             | Diverse SES - Author's Scale     | Survey (local)                      | Low      |                                                  |
|                                                             |         | 108  | Tateno, Kim, Teo, Skokauskas, Guerrero & Kato (2019)      | School                     | 573  | Young Adults                              | Unknown                     | Not Specified                    | Survey (local)                      | Low      | Target Population: Japanese Speaking Individuals |
| Social Media Disorder Scale                                 | SMD     | 100a | van den Eijnden, Lemmens & Valkenburg (2016)              | Online                     | 2198 | School Age<br>Adolescence                 | Unknown                     | Not Specified                    | Survey (local)                      | Low      |                                                  |
|                                                             |         | 109  | Savci, Ercengiz & Aysan (2018)                            | Unknown                    | 553  | Adolescence                               | Unknown                     | Not Specified                    | Survey (local)                      | Low      |                                                  |
| Social Networking Activity Intensity Scale                  | SNAIS   | 110  | Li et al. (2016)                                          | School                     | 1088 | School Age<br>Adolescence                 | 100% East Asian             | Not Specified                    | Survey (local)                      | Low      |                                                  |
| Structured Clinical Interview for Internet Gaming Disorder  | SCI-IGD | 111  | Koo, Han, Park & Kwon (2017)                              | Clinic & Community Setting | 236  | School Age<br>Adolescence                 | 100% East Asian             | Diverse SES - Author's Scale     | Survey (local) & Clinical Interview | Low      |                                                  |
| Student Laptop Use and Musculoskeletal Posture              | SLUMP   | 112  | D'Silva, Cote, Murphy & Barakat-Haddad (2018a)            | School                     | 33   | Young Adults                              | Unknown                     | Not Specified                    | Survey (local)                      | Low      |                                                  |
|                                                             |         | 113  | D'Silva, Cote, Murphy & Barakat-Haddad (2018b)            | School & Online            | 179  | Young Adults                              | Unknown                     | Not Specified                    | Survey (local)                      | Low      |                                                  |
| Study of Cognition, Adolescents and Mobile Phones           | SCAMP   | 114  | Mireku et al. (2018)                                      | School                     | 350  | School Age                                | 63% White<br>12% Mixed Race | Diverse SES                      | Survey (local)                      | Moderate |                                                  |
| Technology-Related Psychological Consequences Questionnaire |         | 115  | Emelin, Tkhostova & Rasskazova (2014)                     | Unknown                    | 132  | Adolescence<br>Young Adults               | Unknown                     | Not Specified                    | Survey (local)                      | Low      |                                                  |
| Third-Person Effect Questionnaire & Media Exposure List     |         | 73   | Hayee & Kamal (2014)                                      | School                     | 328  | Adolescence<br>Young Adults               | 100% South Asian            | Not Specified                    | Survey (local) & Focus Groups       | High     |                                                  |
| Unnamed                                                     |         | 39a  | Baggio, Iglesias, Berchtold & Suris (2017)                | School & Online            | 3067 | Adolescence                               | Unknown                     | High/Middle SES - Author's Scale | National Survey                     | Low      |                                                  |
|                                                             |         | 77b  | Andrews, Ellis, Shaw & Piwek (2015)                       | In-Home                    | 23   | Young Adults                              | Unknown                     | Not Specified                    | Survey (local)                      | Low      |                                                  |
|                                                             |         | 116  | Etaher & Weir (2016)                                      | School                     | 128  | School Age<br>Adolescence                 | Unknown                     | Not Specified                    | Survey (local)                      | Moderate |                                                  |
|                                                             |         | 117  | Cristia & Seidl (2015)                                    | Online                     | 453  | Infancy<br>Preschool Age                  | Unknown                     | High/Middle SES - Common Index   | Survey (local)                      | Low      |                                                  |
|                                                             |         | 118  | Fikkers, Piotrowski & Valkenburg (2017)                   | Online                     | 238  | School Age<br>Adolescence                 | Unknown                     | Not Specified                    | Survey (local) & Online Diaries     | Low      |                                                  |
|                                                             |         | 119  | Holstein et al. (2014)                                    | School                     | 2100 | School Age<br>Adolescence                 | Unknown                     | Diverse SES - Author's Scale     | Survey (local)                      | Low      |                                                  |
|                                                             |         | 120  | Salgado, Boubeta, Tobío, Mallou, & Couto (2014)           | School                     | 2339 | School Age<br>Adolescence<br>Young Adults | 100% Hispanic               | Not Specified                    | Survey (local)                      | Low      |                                                  |



## Measurement of Digital Media: A Scoping Review

9

|                                                            |         |      |                                                                                              |                     |      |                                           |                           |                                     |                                                                 |     |
|------------------------------------------------------------|---------|------|----------------------------------------------------------------------------------------------|---------------------|------|-------------------------------------------|---------------------------|-------------------------------------|-----------------------------------------------------------------|-----|
|                                                            |         | 121  | Silva, Gunnell & Tremblay (2018)                                                             | School              | 1083 | Adolescence<br>Young Adults               | 100% Hispanic             | Not Specified                       | Survey (local)                                                  | Low |
|                                                            |         | 123a | Goedhart et al. (2018)                                                                       | In-home &<br>Online | 587  | School Age<br>Adolescence<br>Young Adults | 69% Hispanic<br>27% Black | Not Specified                       | Survey (local)                                                  | Low |
| Videogame Addiction<br>Scale for Children                  | VASC    | 122  | Yilmaz, Griffiths & Kan (2017)                                                               | School              | 780  | School Age                                | Unknown                   | High/Middle SES<br>- Author's Scale | Survey (local)                                                  | Low |
| XMobiSense                                                 |         | 123b | Goedhart et al. (2018)                                                                       | In-home &<br>Online | 587  | School Age<br>Adolescence<br>Young Adults | 69% Hispanic<br>27% Black | Not Specified                       | Survey (local) &<br>Experience<br>Sampling (EMA)                | Low |
| Young Diagnostic<br>Questionnaire                          | YDQ     | 124  | Wartberg et al. (2017)                                                                       | School              | 4157 | Adolescence                               | Unknown                   | Not Specified                       | Survey (local)                                                  | Low |
|                                                            |         | 125  | Wartberg, Kriston, Kegel & Thomasius (2016)                                                  | In-Home             | 1000 | School Age<br>Adolescence                 | Unknown                   | Not Specified                       | Survey (local)                                                  | Low |
| Young's Internet Addiction<br>Test - Short Form            | YIAT-SF | 56b  | Evren, Dalbudakb, Topcu, Kutlu, Evren & Pontes (2018)                                        | Online              | 1250 | Young Adults                              | Unknown                   | Not Specified                       | Survey (local)                                                  | Low |
| Youth Leisure-Time<br>Sedentary Behaviour<br>Questionnaire | YLSBQ   | 126  | Cabanas-Sánchez, Martínez-Gómez, Esteban-Cornejo, Castro-Piñero, Conde-Caveda & Veiga (2017) | School              | 1401 | School Age<br>Adolescence<br>Young Adults | Unknown                   | Not Specified                       | Survey (local) &<br>Physiological<br>Measure<br>(accelerometer) | Low |

## Measurement of Digital Media: A Scoping Review

10

Table 2. Digital Media Use Measurement Tool Characteristics – Database Sources

| Measurement Tool                                | Acronym | Source # | Measurement Type     | Informant               | Digital Media Device                            | Media Type                                                                                                                                     | Usage Characteristics                                                                       | Specific Applications/ Websites | Reliability      | Validity         | Author Identified Tool Strengths/Limitations                                                                                                                                                | Notes |
|-------------------------------------------------|---------|----------|----------------------|-------------------------|-------------------------------------------------|------------------------------------------------------------------------------------------------------------------------------------------------|---------------------------------------------------------------------------------------------|---------------------------------|------------------|------------------|---------------------------------------------------------------------------------------------------------------------------------------------------------------------------------------------|-------|
| Addiction Profile Index Internet Addiction Form | APIINT  | 1        | Survey               | Self-Report             | Multi-Screen Composite (Unspecified)            | Internet Browsing                                                                                                                              | Online<br>Non-Educational<br>Consumptive                                                    |                                 | Good             | Good             | Consists of multiple dimensions, including: frequency of internet use, addiction symptoms, impact of internet use on life, craving for internet use, and motivation to reduce internet use. |       |
| Adolescent Health Promotion Short Form          | AHP-SF  | 2        | Survey               | Self-Report             | Television Multi-Screen Composite (Unspecified) | Video Game TV/ Video Streaming                                                                                                                 | Non-Educational<br>Consumptive                                                              |                                 | Good             | Good             | Used multiple methods to establish the tool's validity and reliability, including: construct validity, convergent validity, discriminant validity, and internal consistency.                |       |
| Adolescent Preoccupation with Screens Scale     | APSS    | 3        | Survey               | Self-Report             | Multi-Screen Composite (Unspecified)            | Video Game Social Media Communication (Texting/Video Chatting) TV/ Video Streaming Internet Browsing eBooks Virtual Reality/ Augmented Reality | Active<br>Sedentary<br>Online<br>Offline<br>Solitary<br>Shared<br>Productive<br>Consumptive |                                 | Fair             | Good             |                                                                                                                                                                                             |       |
| Battery Use Screenshot                          | BUS     | 4        | Automated Statistics | Passive Data Collection | Cellphone/ Smartphone                           | Mobile Phone Apps                                                                                                                              | Online<br>Offline                                                                           |                                 | Unknown/ Unclear | Unknown/ Unclear |                                                                                                                                                                                             |       |
| Behavioral Addiction Measure Video Gaming       | BAM-VG  | 5        | Survey               | Self-Report             | Multi-Screen Composite (Unspecified)            | Video Game                                                                                                                                     | Online<br>Offline<br>Non-Educational<br>Consumptive                                         | Facebook                        | Good             | Good             | Tested the BAM-VG in a more representative population than prior research including more females and non-problematic video gamers across a wider age range.                                 |       |

## Measurement of Digital Media: A Scoping Review

11

|                                         |           |    |        |                      |                                                                                         |                         |                                              |                            |                     |                     |                                                                                                                                                                                                                                                                                                       |
|-----------------------------------------|-----------|----|--------|----------------------|-----------------------------------------------------------------------------------------|-------------------------|----------------------------------------------|----------------------------|---------------------|---------------------|-------------------------------------------------------------------------------------------------------------------------------------------------------------------------------------------------------------------------------------------------------------------------------------------------------|
| Bergen Facebook Addiction Scale         | BFAS      | 6  | Survey | Self-Report          | Cellphone/ Smartphone<br>Laptop<br>Tablet<br>Multi-Screen<br>Composite<br>(Unspecified) | Social Media            | Sedentary<br>Online                          | Facebook                   | Good                | Good                | Portuguese<br>Version                                                                                                                                                                                                                                                                                 |
| Bergen Social Media Addiction Scale     | BSMAS     | 7a | Survey | Self-Report          | Unknown/<br>Unclear                                                                     | Social Media            | Online<br>Shared (Online<br>Only)            |                            | Good                | Good                |                                                                                                                                                                                                                                                                                                       |
|                                         |           | 8  | Survey | Self-Report          | Unknown/<br>Unclear                                                                     | Social Media            | Online<br>Non-<br>Educational                |                            | Good                | Good                | Italian<br>Version                                                                                                                                                                                                                                                                                    |
| Chen Internet Addiction Scale - Revised | CIAS-R    | 9a | Survey | Self-Report          | Unknown/<br>Unclear                                                                     | General Internet<br>Use | Sedentary<br>Online<br>Non-<br>Educational   |                            | Fair                | Fair                | The poor positive predictive value, but good negative predictive value of CIAS-R further suggest that the CIAS-R is more inclusive in detecting Internet addicted users than the IAT.<br><br>Believed to be better at identifying those with problematic internet use rather than internet addiction. |
| Chinese Social Media Addiction Scale    |           | 10 | Survey | Self-Report          | Unknown/<br>Unclear                                                                     | Social Media            | Online<br>Non-<br>Educational<br>Consumptive | WeChat<br>QQ<br>Sina Weibo | Good                | Good                | Measures broad social media addiction compared to other measures.<br><br>Addresses variables not addressed in the Facebook Addiction Scale.<br><br>No cut offs for distinguishing addictive from non-addictive users.                                                                                 |
| Clinical Video game Addiction Test 2.0  | C-VAT 2.0 | 11 | Survey | Clinician-<br>Report | Multi-Screen<br>Composite<br>(Unspecified)                                              | Video Game              | Consumptive                                  |                            | Unknown/<br>Unclear | Unknown<br>/Unclear |                                                                                                                                                                                                                                                                                                       |

## Measurement of Digital Media: A Scoping Review

12

|                               |      |     |                             |                                 |                                      |                              |                                    |                 |                 |                                                                                                                                                                                                                  |
|-------------------------------|------|-----|-----------------------------|---------------------------------|--------------------------------------|------------------------------|------------------------------------|-----------------|-----------------|------------------------------------------------------------------------------------------------------------------------------------------------------------------------------------------------------------------|
| Compulsive Internet Use Scale | CIUS | 12a | Survey                      | Self-Report                     | Multi-Screen Composite (Unspecified) | Internet Browsing            | Online                             | Good            | Good            | Brief measure.<br><br>Measures the severity of the core elements of compulsive internet use.<br><br>No statistically proven cut off scores for compulsive and non-compulsive internet use.                       |
|                               |      | 13  | Survey                      | Self-Report                     | Multi-Screen Composite (Unspecified) | Internet Browsing            | Online                             | Unknown/Unclear | Unknown/Unclear | Validated for use in private and public school settings.                                                                                                                                                         |
|                               |      | 14  | Survey                      | Self-Report                     | Unknown/Unclear                      | Internet Browsing            | Online                             | Good            | Good            | More suitable for research and clinical applications compare to other measures in the field.<br><br>Economically advantaged due to its short length and ease of use allowing the tool to be administered online. |
|                               |      | 15  | Survey                      | Self-Report                     | Unknown/Unclear                      | Internet Browsing            | Online                             | Good            | Good            |                                                                                                                                                                                                                  |
|                               |      | 16  | Survey                      | Self-Report                     | Unknown/Unclear                      | Internet Browsing            | Online                             | Fair            | Good            | Cut offs for Internet Addiction are not well validated.<br><br>Strongly varying factor structures for the IAT are found in research. This study supported the six-factor structure.                              |
|                               |      | 17b | Survey Automated Statistics | Self-Report Joint Parent-Report | Unknown/Unclear                      | Video Game Internet Browsing | Non-Educational Consumptive        | Fair            | Good            | German Version                                                                                                                                                                                                   |
|                               |      | 18b | Survey                      | Self-Report                     | Multi-Screen Composite (Unspecified) | Internet Browsing            | Online Non-Educational Consumptive | Good            | Good            |                                                                                                                                                                                                                  |
|                               |      | 19  | Survey                      | Self-Report                     | Multi-Screen Composite (Unspecified) | Internet Browsing            | Online Consumptive                 | Good            | Good            |                                                                                                                                                                                                                  |

## Measurement of Digital Media: A Scoping Review

13

|                                                                |        |    |        |                                                       |                                            |                                                           |                                                                         |      |                     |                                                                                                                                                                                                                                                                                                                                    |
|----------------------------------------------------------------|--------|----|--------|-------------------------------------------------------|--------------------------------------------|-----------------------------------------------------------|-------------------------------------------------------------------------|------|---------------------|------------------------------------------------------------------------------------------------------------------------------------------------------------------------------------------------------------------------------------------------------------------------------------------------------------------------------------|
|                                                                |        | 20 | Survey | Self-Report<br>Parent-<br>Report                      | Multi-Screen<br>Composite<br>(Unspecified) | Internet Browsing                                         | Online                                                                  | Good | Unknown<br>/Unclear |                                                                                                                                                                                                                                                                                                                                    |
| Content-based<br>Media Exposure<br>Scale                       | C-ME   | 21 | Survey | Self-Report                                           | Cellphone/<br>Smartphone                   | Video Game<br>Internet Browsing<br>TV/ Video<br>Streaming | Online<br>Offline<br>Non-<br>Educational<br>Consumptive                 | Good | Good                | Measures a wider array of antisocial and risk behaviour content in popular media than common media exposure measurements.                                                                                                                                                                                                          |
| Diagnostic<br>Classification<br>Test for Internet<br>Addiction | DCT-IA | 22 | Survey | Self-Report                                           | Multi-Screen<br>Composite<br>(Unspecified) | Internet Browsing<br>Video Game                           | Online                                                                  | Good | Good                | Can simultaneously measure general diagnostic information and detailed symptom criteria-level information for internet addiction based on the DSM-V.<br><br>All items were transformed to dichotomous (Yes/No) responses.                                                                                                          |
| Excessive<br>Internet Use<br>Scale                             | EIU    | 23 | Survey | Self-Report<br>Parent-<br>Report                      | Multi-Screen<br>Composite<br>(Unspecified) | Internet Browsing                                         | Online<br>Shared (Online<br>Only)<br>Non-<br>Educational<br>Consumptive | Good | Unknown<br>/Unclear | Provides measurement of a broad range of potentially problematic internet use behaviours without asking about specific experiences or activities.<br><br>Validated across Europe. Tested in 18 national surveys and in 15 languages.<br><br>Only measures excessive internet use and does not take into account online activities. |
| Food, Health,<br>and Choices<br>Questionnaire                  | FHC-Q  | 24 | Survey | Self-Report                                           | Television<br>Gaming<br>Consoles           | Video Game<br>TV/ Video<br>Streaming                      |                                                                         | Good | Poor                |                                                                                                                                                                                                                                                                                                                                    |
| Game<br>Addiction<br>Identification<br>Test                    | GAIT   | 25 | Survey | Self-Report<br>Mother-<br>Report<br>Father-<br>Report | Multi-Screen<br>Composite<br>(Unspecified) | Video Game                                                | Online<br>Offline<br>Consumptive                                        | Good | Good                | First validated tool to measure gaming addiction symptoms in Swedish adolescents.<br><br>High concordance between adolescent self-report and parent-report.                                                                                                                                                                        |

## Measurement of Digital Media: A Scoping Review

14

|                                              |       |     |        |             |                                                         |                                                                                                   |                                                                     |                 |                 |                                                                                       |                                                                                                      |                    |
|----------------------------------------------|-------|-----|--------|-------------|---------------------------------------------------------|---------------------------------------------------------------------------------------------------|---------------------------------------------------------------------|-----------------|-----------------|---------------------------------------------------------------------------------------|------------------------------------------------------------------------------------------------------|--------------------|
| Game Addiction Scale                         | GAS   | 26  | Survey | Self-Report | Unknown/Unclear                                         | Video Game                                                                                        | Consumptive                                                         | Unknown/Unclear | Fair            | Five-point Likert scale rather than a dichotomous tool, allowing greater sensitivity. |                                                                                                      |                    |
|                                              |       | 27  | Survey | Self-Report | Unknown/Unclear                                         | Video Game                                                                                        | Online<br>Offline<br>Solitary<br>Shared                             | Good            | Good            |                                                                                       | Brazilian Version                                                                                    |                    |
|                                              |       | 28  | Survey | Self-Report | Unknown/Unclear                                         | Video Game                                                                                        |                                                                     | Unknown/Unclear | Unknown/Unclear |                                                                                       |                                                                                                      |                    |
|                                              |       | 29  | Survey | Self-Report | Laptop<br>Gaming<br>Consoles                            | Video Game                                                                                        | Non-Educational                                                     | Good            | Good            |                                                                                       | 7 and 21-item adapted versions                                                                       |                    |
| Generalized Problematic Internet Use Scale 2 | GPIU2 | 30  | Survey | Self-Report | Multi-Screen Composite (Unspecified)                    | Social Media                                                                                      | Sedentary<br>Online<br>Non-Educational<br>Productive<br>Consumptive | Facebook        | Good            | Good                                                                                  | Valid measure of generalized problematic internet use as determined by confirmatory factor analysis. | Portuguese version |
|                                              |       | 31  | Survey | Self-Report | Cellphone/<br>Smartphone<br>Laptop<br>Desktop<br>Tablet | Unknown/Unclear                                                                                   | Sedentary<br>Online<br>Solitary                                     | Good            | Good            | Valid alternative measure of problematic internet use.                                | Portuguese Version                                                                                   |                    |
|                                              |       | 32a | Survey | Self-Report | Unknown/Unclear                                         | Internet Browsing                                                                                 | Online<br>Non-Educational                                           | Good            | Poor            | Validated for use in the Portuguese cultural context.                                 |                                                                                                      |                    |
| Healthy Computing Questionnaire for Children | HCQC  | 33  | Survey | Self-Report | Laptop<br>Desktop<br>Tablet                             | Video Game<br>Communication (Texting/Video Chatting)<br>Internet Browsing<br>General Computer Use | Online<br>Offline<br>Solitary<br>Shared<br>Educational              | Good            | Good            |                                                                                       |                                                                                                      |                    |
| Healthy Living for Kids Survey               | HLKS  | 34  | Survey | Self-Report | Laptop<br>Television<br>Gaming<br>Consoles              | Video Game<br>TV/ Video<br>Streaming                                                              | Sedentary<br>Consumptive                                            | Fair            | Unknown/Unclear |                                                                                       |                                                                                                      |                    |
| Implicit Association Test                    |       | 34  | Survey | Self-Report | Multi-Screen Composition (Unspecified)                  | Internet Browsing                                                                                 | Online<br>Consumptive<br>Productive                                 | Poor            | Good            | Brief measure that is feasible to implement in a variety of settings.                 |                                                                                                      |                    |
| Internet Abusive Use Questionnaire           | IAUQ  | 36  | Survey | Self-Report | Unknown/Unclear                                         | Internet Browsing                                                                                 | Online                                                              | Good            | Good            | Accessible to populations with average reading ability based on readability analyses. |                                                                                                      |                    |
| Internet Addiction Diagnostic Questionnaire  | IADQ  | 37a | Survey | Self-Report | Unknown/Unclear                                         | Internet Browsing                                                                                 | Online                                                              | Fair            | Good            |                                                                                       |                                                                                                      |                    |

## Measurement of Digital Media: A Scoping Review

15

|                             |        |             |                                   |                   |                                            |                                                                   |                                              |                     |                                                                                                             |                                                                                                                                                                                                                                                                                  |                                                |
|-----------------------------|--------|-------------|-----------------------------------|-------------------|--------------------------------------------|-------------------------------------------------------------------|----------------------------------------------|---------------------|-------------------------------------------------------------------------------------------------------------|----------------------------------------------------------------------------------------------------------------------------------------------------------------------------------------------------------------------------------------------------------------------------------|------------------------------------------------|
| Internet<br>Addiction Scale | IAS    | 41          | Survey                            | Self-Report       | Unknown/<br>Unclear                        | Online Internet<br>Gaming                                         | Online<br>Solitary<br>Consumptive            | Good                | Good                                                                                                        | Validated to assess internet<br>addiction based on the<br>diagnostic criteria in the<br>DSM-V.<br><br>Limited testing in clinical<br>settings.<br><br>Some factors consisted of<br>only two question items.                                                                      | Predominan<br>tly male<br>sample<br>population |
|                             |        | 38          | Survey<br>Automated<br>Statistics | Self-Report       | Unknown/<br>Unclear                        | Internet Browsing                                                 | Online<br>Non-<br>Educational<br>Consumptive | Good                | Good                                                                                                        |                                                                                                                                                                                                                                                                                  |                                                |
| Internet<br>Addiction Test  | IAT    | 37b         | Survey                            | Self-Report       | Unknown/<br>Unclear                        | Internet Browsing                                                 | Online                                       | Good                | Good                                                                                                        |                                                                                                                                                                                                                                                                                  | Turkish<br>Sample                              |
|                             |        | 39b         | Survey                            | Self-Report       | Unknown/<br>Unclear                        | Internet Browsing                                                 | Online                                       | Poor                | Poor                                                                                                        |                                                                                                                                                                                                                                                                                  |                                                |
|                             |        | 40a         | Survey                            | Self-Report       | Cellphone/<br>Smartphone                   | Communication<br>(Texting/Video<br>Chatting)<br>Internet Browsing | Online<br>Offline                            | Good                | Good                                                                                                        | Determined that the IAT can<br>be divided into a three-factor<br>model: (1) withdrawal and<br>social problems, (2) time<br>management and<br>performance, and (3) reality<br>substitute.                                                                                         |                                                |
|                             |        | 12b         | Survey                            | Self-Report       | Multi-Screen<br>Composite<br>(Unspecified) | Internet Browsing                                                 | Online                                       | Unknown/<br>Unclear | Unknown<br>/Unclear                                                                                         | IAT received the highest<br>number of psychometric<br>validations within different<br>demographics, cultures, and<br>languages.                                                                                                                                                  |                                                |
|                             |        | 42          | Survey                            | Self-Report       | Multi-Screen<br>Composite<br>(Unspecified) | Internet Browsing                                                 | Online                                       | Good                | Good                                                                                                        | Easy to administer and<br>interpret.<br><br>Applicable to a wide range<br>of measurement settings.<br><br>No agreement in the field on<br>the clinical cut off points for<br>the IAT. Some have<br>proposed cut off scores, but<br>these have not been<br>empirically validated. |                                                |
| 43                          | Survey | Self-Report | Unknown/<br>Unclear               | Internet Browsing | Online                                     | Facebook<br>Tuenti                                                | Good                                         | Good                | Some items of this<br>questionnaire may be<br>outdated due to<br>technological and/or lifestyle<br>changes. | Spanish<br>Version<br><br>Factors of<br>technology<br>use and<br>lifestyle<br>have been                                                                                                                                                                                          |                                                |

## Measurement of Digital Media: A Scoping Review

16

|     |        |             |                                            |                               |                                                           |                     |                     |                                                                                                                                                                                                                                               |
|-----|--------|-------------|--------------------------------------------|-------------------------------|-----------------------------------------------------------|---------------------|---------------------|-----------------------------------------------------------------------------------------------------------------------------------------------------------------------------------------------------------------------------------------------|
| 44  | Survey | Self-Report | Unknown/<br>Unclear                        | Internet Browsing             | Online                                                    | Good                | Good                | noted as<br>being<br>outdated                                                                                                                                                                                                                 |
| 32b | Survey | Self-Report | Unknown/<br>Unclear                        | Internet Browsing             | Online<br>Non-<br>Educational                             | Unknown/<br>Unclear | Unknown<br>/Unclear | Italian<br>Version                                                                                                                                                                                                                            |
| 45  | Survey | Self-Report | Unknown/<br>Unclear                        | Internet Browsing             | Online                                                    | Good                | Good                |                                                                                                                                                                                                                                               |
| 46  | Survey | Self-Report | Unknown/<br>Unclear                        | Internet Browsing             | Online                                                    | Good                | Unknown<br>/Unclear | Polish<br>Version                                                                                                                                                                                                                             |
| 9b  | Survey | Self-Report | Unknown/<br>Unclear                        | General Internet<br>Use       | Sedentary<br>Online<br>Non-<br>Educational                | Good                | Unknown<br>/Unclear |                                                                                                                                                                                                                                               |
| 47  | Survey | Self-Report | Unknown/<br>Unclear                        | Internet Browsing             | Sedentary<br>Online<br>Non-<br>Educational<br>Consumptive | Good                | Good                | Turkish<br>Version<br><br>Sample<br>population<br>was<br>exclusively<br>university<br>undergradu<br>ate<br>students.                                                                                                                          |
| 48  | Survey | Self-Report | Unknown/<br>Unclear                        | Video Game<br>Internet Gaming | Online<br>Non-<br>Educational<br>Consumptive              | Good                | Good                | Italian<br>Version                                                                                                                                                                                                                            |
| 49  | Survey | Self-Report | Multi-Screen<br>Composite<br>(Unspecified) | Unknown/Unclear               | Online                                                    | Good                | Good                | Lack of consistent and tested<br>cut-off scores.<br><br>Items of the IAT do not<br>appear to be developed using<br>a rigorous psychometric<br>process.<br><br>Items are outdated in aspects<br>of Internet use.<br><br>No temporal dimension. |
| 50  | Survey | Self-Report | Multi-Screen<br>Composite<br>(Unspecified) | Internet Browsing             | Online<br>Non-<br>Educational<br>Consumptive              | Good                | Good                | Culturally adapted and<br>validated a Greek version of<br>the IAT.<br><br>Three factors:<br>psychological/emotional<br><br>Greek<br>Version<br><br>Sample<br>population<br>was                                                                |



## Measurement of Digital Media: A Scoping Review

17

|                                             |          |     |        |               |                                      |                              |                             |                 |                 |                                                                                                                  |                                                    |
|---------------------------------------------|----------|-----|--------|---------------|--------------------------------------|------------------------------|-----------------------------|-----------------|-----------------|------------------------------------------------------------------------------------------------------------------|----------------------------------------------------|
|                                             |          | 51  | Survey | Self-Report   | Multi-Screen Composite (Unspecified) | Internet Browsing            | Online                      | Good            | Good            | conflict, time management, and neglected work.                                                                   | exclusively medical school students.               |
| IAT-A                                       |          | 52  | Survey | Self-Report   | Multi-Screen Composite (Unspecified) | Internet Browsing            | Online                      | Good            | Good            | Could not reliably differentiate between addicts and non-addicts.                                                | Adolescent version                                 |
| s-IAT-sex                                   |          | 53  | Survey | Self-Report   | Multi-Screen Composite (Unspecified) | Internet Browsing            | Online Consumptive          | Good            | Good            |                                                                                                                  | Short version adapted to online sexual activities. |
| Internet Addiction Test - Short Version     | s-IAT    | 54  | Survey | Self-Report   | Multi-Screen Composite (Unspecified) | Unknown/Unclear              | Online                      | Fair            | Good            | Validated the s-IAT in a Vietnamese population.                                                                  | Sample population is exclusively male.             |
| Internet Disorder Scale                     | IDS-15   | 55  | Survey | Self-Report   | Multi-Screen Composite (Unspecified) | Internet Browsing            | Online Non-Educational      | Good            | Good            | Stable two-factor structure.                                                                                     | No cut-off scores to determine Internet addiction. |
| Internet Gaming Disorder Questionnaire      | IGDQ     | 17a | Survey | Self-Report   | Unknown/Unclear                      | Video Game Internet Browsing | Non-Educational Consumptive | Good            | Fair            |                                                                                                                  | German Version                                     |
| Internet Gaming Disorder Scale              | IGDS     | 56c | Survey | Self-Report   | Unknown/Unclear                      | Video Game                   | Online Offline Consumptive  | Good            | Fair            |                                                                                                                  |                                                    |
|                                             |          | 57  | Survey | Self-Report   | Unknown/Unclear                      | Video Game                   | Online Offline Consumptive  | Unknown/Unclear | Unknown/Unclear |                                                                                                                  |                                                    |
|                                             |          | 58  | Survey | Parent-Report | Multi-Screen Composite (Unspecified) | Video Game                   | Consumptive                 | Good            | Fair            | Moderate concordance between parent and adolescent ratings. Seems that both assessments are not interchangeable. |                                                    |
| Internet Gaming Disorder Scale - Short Form | IGDS-SF9 | 56a | Survey | Self-Report   | Unknown/Unclear                      | Video Game                   | Online Offline Consumptive  | Fair            | Good            | Findings support the usage of this tool as an early diagnostic tool for Internet Gaming Disorder.                | Turkish Version                                    |
|                                             |          |     |        |               |                                      |                              |                             |                 |                 | No history of time spent playing online games was                                                                |                                                    |

## Measurement of Digital Media: A Scoping Review

18

|                                 |       |  |  |  |  |  |  |  |                                                                                                                                                                           |                                       |
|---------------------------------|-------|--|--|--|--|--|--|--|---------------------------------------------------------------------------------------------------------------------------------------------------------------------------|---------------------------------------|
|                                 |       |  |  |  |  |  |  |  | measured.                                                                                                                                                                 |                                       |
|                                 |       |  |  |  |  |  |  |  | Not used to diagnose Internet Gaming Disorder.                                                                                                                            |                                       |
|                                 |       |  |  |  |  |  |  |  | Based on the diagnostic criteria for Internet Gaming Disorder in the DSM-V.                                                                                               | Persian Version                       |
|                                 |       |  |  |  |  |  |  |  | One-factor structure, invariant across gender.                                                                                                                            |                                       |
|                                 |       |  |  |  |  |  |  |  | Brief standardized and psychometrically sound measure for assessing Internet Gaming Disorder as outlined by the DSM-V.                                                    |                                       |
|                                 |       |  |  |  |  |  |  |  | Clinical cut-offs need to be further tested to confirm their validity.                                                                                                    |                                       |
|                                 |       |  |  |  |  |  |  |  | May underestimate or overestimate participant's Internet Gaming Disorder level.                                                                                           |                                       |
|                                 |       |  |  |  |  |  |  |  | Determined that the Polish version of the IGDS9-SF adequately assesses Internet Gaming Disorder in Polish gamers.                                                         | Predominantly male sample population. |
|                                 |       |  |  |  |  |  |  |  | Suitable measure for assessing Internet Gaming Disorder. However, two items (7 & 8) were psychometrically problematic and presented with the poorest diagnostic accuracy. |                                       |
|                                 |       |  |  |  |  |  |  |  | Valid and reliable in Portuguese adolescent population.                                                                                                                   | Portuguese Version                    |
|                                 |       |  |  |  |  |  |  |  |                                                                                                                                                                           |                                       |
|                                 |       |  |  |  |  |  |  |  |                                                                                                                                                                           |                                       |
| Internet Gaming Disorder Test 2 | IGD-2 |  |  |  |  |  |  |  |                                                                                                                                                                           | Arabic Version                        |

## Measurement of Digital Media: A Scoping Review

19

|                                                |         |     |        |             |                                                          |                                                                                                                           |                                                       |          |                     |                     |                                                                                                                                                                                                     |
|------------------------------------------------|---------|-----|--------|-------------|----------------------------------------------------------|---------------------------------------------------------------------------------------------------------------------------|-------------------------------------------------------|----------|---------------------|---------------------|-----------------------------------------------------------------------------------------------------------------------------------------------------------------------------------------------------|
| Internet Gaming Disorder Test 10               | IGDT-10 | 65a | Survey | Self-Report | Laptop<br>Desktop<br>Gaming<br>Consoles                  | Video Game                                                                                                                | Non-Educational<br>Consumptive                        |          | Fair                | Good                | First study to provide empirical information about the measurement performance of the nine Internet Gaming Disorder criteria using IRT analysis.                                                    |
| Internet Gaming Disorder Test 20               | IGD-20  | 66  | Survey | Self-Report | Cellphone/<br>Smartphone<br>Laptop<br>Gaming<br>Consoles | Video Game                                                                                                                | Online<br>Offline<br>Non-Educational                  |          | Good                | Good                | Applicable to all gamers and genres.                                                                                                                                                                |
|                                                |         | 67  | Survey | Self-Report | Cellphone/<br>Smartphone<br>Laptop<br>Gaming<br>Consoles | Video Game                                                                                                                | Online<br>Offline                                     |          | Good                | Good                | Spanish Version                                                                                                                                                                                     |
| Internet Gratification Scale for Adolescents   |         | 68  | Survey | Self-Report | Unknown/<br>Unclear                                      | Internet Browsing                                                                                                         | Online<br>Solitary<br>Shared                          |          | Good                | Good                |                                                                                                                                                                                                     |
| Internet Motive Questionnaire for Adolescents  | IMQ-A   | 69  | Survey | Self-Report | Cellphone/<br>Smartphone<br>Laptop                       | Video Game<br>Social Media<br>Communication<br>(Texting/Video<br>Chatting)<br>TV/ Video<br>Streaming<br>Internet Browsing | Online<br>Facebook<br>Skype<br>ICQ                    |          | Unknown/<br>Unclear | Fair                | Valid and reliable measure to assess adolescent motives for internet use.<br><br>Motives assessed focus on affective change. Other motives should also be considered such as wanting to play games. |
| Korean Scale for Internet Addiction            | K-Scale | 70  | Survey | Self-Report | Unknown/<br>Unclear                                      | General Internet Use                                                                                                      | Sedentary<br>Online<br>Non-Educational<br>Consumptive |          | Fair                | Good                | Validated the K-Scale for use beyond Korean populations.<br><br>Validated for use in Japanese populations.                                                                                          |
| Korean Smartphone Addiction Proneness Scale    |         | 71  | Survey | Self-Report | Cellphone/<br>Smartphone                                 | General Mobile Phone Use                                                                                                  | Sedentary<br>Online<br>Offline                        |          | Good                | Good                | Author Created                                                                                                                                                                                      |
| Media and Technology Usage and Attitudes Scale | MTUAS   | 72b | Survey | Self-Report | Cellphone/<br>Smartphone                                 | Video Game<br>Social Media<br>Communication<br>(Texting/Video<br>Chatting)<br>TV/ Video<br>Streaming<br>Internet Browsing | Online<br>Offline                                     | Facebook | Unknown/<br>Unclear | Unknown/<br>Unclear | 15 subscales that break down smartphone use into discrete types.                                                                                                                                    |
| Mobile Phone Addiction Craving Scale           |         | 74a | Survey | Self-Report | Cellphone/<br>Smartphone                                 | Unknown/Unclear                                                                                                           |                                                       |          | Good                | Good                | Helpful and fast evaluation tool of cell phone craving in the general population.                                                                                                                   |

## Measurement of Digital Media: A Scoping Review

20

|                                                      |          |     |                                   |             |                                            |                                                                                                                       |                                              |                     |                     |                                                                                                                                                                                |                                                 |
|------------------------------------------------------|----------|-----|-----------------------------------|-------------|--------------------------------------------|-----------------------------------------------------------------------------------------------------------------------|----------------------------------------------|---------------------|---------------------|--------------------------------------------------------------------------------------------------------------------------------------------------------------------------------|-------------------------------------------------|
|                                                      |          | 40b | Survey                            | Self-Report | Cellphone/<br>Smartphone                   | Communication<br>(Texting/Video<br>Chatting)<br>Internet Browsing                                                     | Online<br>Offline                            | Unknown/<br>Unclear | Good                | Did not assess anticipatory thoughts or previous time stages, as other scales have observed.                                                                                   |                                                 |
| Mobile Phone<br>Dependence<br>Questionnaire          | MPDQ     |     |                                   |             |                                            |                                                                                                                       |                                              |                     |                     | Assess three dimensions of mobile phone addiction: (1) compulsive text messaging, (2) compulsive making/receiving calls, and (3) distorted thinking about using mobile phones. |                                                 |
|                                                      |          | 75  | Survey                            | Self-Report | Cellphone/<br>Smartphone                   | Communication<br>(Texting/Video<br>Chatting)                                                                          | Shared (Online<br>Only)                      | Poor                | Fair                |                                                                                                                                                                                |                                                 |
| Mobile Phone<br>Involvement<br>Questionnaire         |          | 76b | Survey                            | Self-Report | Cellphone/<br>Smartphone                   |                                                                                                                       |                                              | Fair                | Unknown<br>/Unclear |                                                                                                                                                                                |                                                 |
|                                                      |          | 77a | Survey<br>Automated<br>Statistics | Self-Report | Cellphone/<br>Smartphone                   | Social Media<br>Communication<br>(Texting/Video<br>Chatting)<br>TV/ Video<br>Streaming<br>Internet Browsing<br>eBooks |                                              | Good                | Poor                |                                                                                                                                                                                |                                                 |
| Mobile Phone<br>Problem Use<br>Scale                 | MPPUS    | 78a | Survey                            | Self-Report | Cellphone/<br>Smartphone                   | General Mobile<br>Phone Use                                                                                           | Sedentary                                    | Good                | Good                | Greater reliability than the original MPPUS1.                                                                                                                                  | Spanish version adapted for British adolescents |
|                                                      |          | 74b | Survey                            | Self-Report | Cellphone/<br>Smartphone                   |                                                                                                                       |                                              | Unknown/<br>Unclear | Unknown<br>/Unclear |                                                                                                                                                                                |                                                 |
| Mobile Phone<br>Problem Use<br>Scale - Short<br>Form | MPPUS-10 | 79  | Survey                            | Self-Report | Cellphone/<br>Smartphone                   | Communication<br>(Texting/Video<br>Chatting)                                                                          | WhatsApp                                     | Unknown/<br>Unclear | Fair                | Study data is objective (collected from the Swiss network operators) minimizing recall bias.                                                                                   |                                                 |
|                                                      |          | 80  | Survey                            | Self-Report | Multi-Screen<br>Composite<br>(Unspecified) | Internet Browsing<br>Other Online<br>Activities                                                                       | Online                                       | Good                | Fair                | Valid measure of pathological internet use.                                                                                                                                    | Polish version                                  |
| Online<br>Cognition Scale                            | OCS      | 81  | Survey                            | Self-Report | Unknown/<br>Unclear                        | Video Game                                                                                                            | Online<br>Non-<br>Educational<br>Consumptive | Good                | Good                |                                                                                                                                                                                | Modified version focused on online gaming.      |
| Online Gaming<br>Addiction Scale                     | OGAS     | 82  | Survey                            | Self-Report | Unknown/<br>Unclear                        | Video Game<br>Online Role-<br>Playing Game                                                                            | Online<br>Non-<br>Educational<br>Consumptive | Good                | Good                | Differences in frequency of use based on day of the week was not assessed. Future research should measure frequency on weekdays and                                            |                                                 |

## Measurement of Digital Media: A Scoping Review

21

| Study Name                                                                                          | Instrument | Sample Size | Design                                           | Data Source                            | Media Type                           | Context                        | Reliability                                       | Validity                | Notes                                                       |                                                                                                                                                                                                                                             |                                                                                                                                                            |
|-----------------------------------------------------------------------------------------------------|------------|-------------|--------------------------------------------------|----------------------------------------|--------------------------------------|--------------------------------|---------------------------------------------------|-------------------------|-------------------------------------------------------------|---------------------------------------------------------------------------------------------------------------------------------------------------------------------------------------------------------------------------------------------|------------------------------------------------------------------------------------------------------------------------------------------------------------|
| Out-Of-School Nutrition and Physical Activity - Observational Practice Assessment Tool              | OSNAP-OPAT | 83          | Ecological Momentary Assessment (EMA/ESM) Survey | Passive Data Collection Teacher-Report | Multi-Screen Composite (Unspecified) | Unknown/Unclear Educational    | Poor                                              | Fair                    | weekends due to adolescent routines during the school week. |                                                                                                                                                                                                                                             |                                                                                                                                                            |
| Parents Role in Establishing healthy Physical Activity and Sedentary behaviour habits questionnaire | PREPS      | 84          | Survey                                           | Parent-Report                          | Multi-Screen Composite (Unspecified) | Video Game TV/ Video Streaming | Sedentary Educational                             | Good                    | Fair                                                        |                                                                                                                                                                                                                                             |                                                                                                                                                            |
| Persian Nomophobia Questionnaire                                                                    | NMP-Q      | 76a         | Survey                                           | Self-Report                            | Cellphone/ Smartphone                |                                |                                                   | Good                    | Good                                                        |                                                                                                                                                                                                                                             |                                                                                                                                                            |
| Problem Video Game Playing Scale                                                                    | PVP        | 85          | Survey                                           | Self-Report                            | Multi-Screen Composite (Unspecified) | Video Game                     | Online Offline Consumptive                        | Online Gaming Platforms | Poor                                                        | Fair                                                                                                                                                                                                                                        | Reliability was low to moderate. This has been seen in other Spanish research. May indicate inadequacy in the wording of the Spanish version.              |
|                                                                                                     |            | 78b         | Survey                                           | Self-Report                            | Multi-Screen Composite (Unspecified) | Video Game                     | Online Offline Consumptive                        |                         | Fair                                                        | Fair                                                                                                                                                                                                                                        |                                                                                                                                                            |
| Problematic and Risky Internet Use Screening Scale                                                  | PRIUSS     | 87          | Survey                                           | Self-Report                            | Unknown/Unclear                      | Internet Browsing              | Online Consumptive                                | Good                    | Poor                                                        | Validated short screener for problematic internet use. Did not evaluate all possible combinations of items and thresholds to create the PRIUSS-3. Instead, a set of 3 scales was selected methodically and purposefully and then evaluated. | Predominantly female sample population.                                                                                                                    |
| Problematic Facebook Use Scale                                                                      | PFUS       | 88          | Survey                                           | Self-Report                            | Unknown/Unclear                      | Social Media                   | Sedentary Online Shared (Online Only) Consumptive | Facebook                | Good                                                        | Fair                                                                                                                                                                                                                                        | Five-factor structure that provides a good fit to the data. Tested across gender and multiple age groups. Invariance of the model supported across groups. |

## Measurement of Digital Media: A Scoping Review

22

|                                                              |          |     |                              |                              |                                      |                   |                                                               |                               |                 |      | No cut offs for distinguishing problematic from non-problematic users.                                                                                                       |
|--------------------------------------------------------------|----------|-----|------------------------------|------------------------------|--------------------------------------|-------------------|---------------------------------------------------------------|-------------------------------|-----------------|------|------------------------------------------------------------------------------------------------------------------------------------------------------------------------------|
| Problematic Internet Entertainment Use Scale for Adolescents | PIEUSA   | 78c | Survey                       | Self-Report                  | Unknown/Unclear                      | Unknown/unclear   | Online Non-Educational Consumptive                            |                               | Good            | Fair |                                                                                                                                                                              |
| Problematic Internet Use Questionnaire                       | PIUQ     | 90  | Survey                       | Self-Report                  | Unknown/Unclear                      | Internet Browsing | Online                                                        |                               | Unknown/Unclear | Good | Did not assess time spent online or the activities conducted online.                                                                                                         |
| Problematic Internet Use Questionnaire - Short Form          | PIUQ-SF  | 91  | Survey                       | Self-Report                  | Unknown/Unclear                      | Internet Browsing | Online                                                        |                               | Poor            | Good |                                                                                                                                                                              |
| Problematic Internet Use Scale                               | PIUS     | 92  | Survey                       | Self-Report                  | Multi-Screen Composite (Unspecified) | Internet Browsing | Online Solitary                                               |                               | Good            | Good | Scale was developed by a multidisciplinary team of experts using previous research in a variety of fields.                                                                   |
| Problematic Mobile Phone Use Questionnaire Revised           | PMPU-Q-R | 93  | Survey                       | Self-Report Clinician-Report | Cellphone/Smartphone                 | Unknown/Unclear   | Productive Consumptive                                        | Facebook<br>Twitter<br>Reddit | Good            | Good | Used focus groups to collect feedback on the measurement tool. Highlighted the need to consider sociocultural context in regard to problematic or antisocial smartphone use. |
| Problematic Online Gaming Questionnaire                      | POGQ     | 65b | Survey                       | Self-Report                  | Laptop Desktop Gaming Consoles       | Video Game        | Non-Educational Consumptive                                   |                               | Good            | Fair |                                                                                                                                                                              |
|                                                              |          | 94  | Survey                       | Self-Report                  | Multi-Screen Composite (Unspecified) | Video Game        | Online Offline Shared (In-Person) Non-Educational Consumptive |                               | Good            | Good | Can be used regardless of whether participants are online or offline video gamers. However, this study did not consider offline gaming behaviour.                            |
| Problematic Social Networking Services Use Scale             | PSUS     | 95  | Survey Structured Interviews | Self-Report                  | Unknown/Unclear                      | Social Networking | Online Non-Educational Consumptive                            |                               | Good            | Good |                                                                                                                                                                              |
| Psycho-Social Aspects of Facebook Use                        | PSAFU    | 96  | Survey                       | Self-Report                  | Unknown/Unclear                      | Social Media      | Sedentary Online Solitary Shared Non-                         | Facebook                      | Good            | Fair | Predominantly female sample population                                                                                                                                       |

## Measurement of Digital Media: A Scoping Review

23

|                                            |       |      |                                   |                                              |                                                  | Educational<br>Productive<br>Consumptive                                             |                                              |                                                                                  |                     |                                                                                                                                                                      |                                                                               |  |
|--------------------------------------------|-------|------|-----------------------------------|----------------------------------------------|--------------------------------------------------|--------------------------------------------------------------------------------------|----------------------------------------------|----------------------------------------------------------------------------------|---------------------|----------------------------------------------------------------------------------------------------------------------------------------------------------------------|-------------------------------------------------------------------------------|--|
| Radio-Frequency Identification             | RFID  | 97   | Automated Statistics              | Passive Data Collection                      | Television                                       | TV/ Video Streaming                                                                  | Sedentary<br>Offline<br>Consumptive          | Poor                                                                             | Unknown<br>/Unclear | First tool to measure TV viewing time directly with a wireless connection.                                                                                           |                                                                               |  |
| Risk of Addiction to Social Networks Scale | CrARS | 98   | Survey                            | Self-Report                                  | Unknown/<br>Unclear                              | Social Media                                                                         | Online                                       | Good                                                                             | Good                | No risk of response bias.                                                                                                                                            |                                                                               |  |
| Sedentary Behaviour Questionnaires         |       | 99   | Survey<br>Automated<br>Statistics | Self-Report<br>Passive<br>Data<br>Collection | Cellphone/<br>Smartphone<br>Laptop<br>Television | Video Game<br>Communication<br>(Texting/Video<br>Chatting)<br>TV/ Video<br>Streaming | Sedentary<br>Online<br>Offline               | Fair                                                                             | Good                |                                                                                                                                                                      | Not a formal questionnaire. Rather, a composition of multiple questionnaires. |  |
| Short Problematic Internet Use Test        | SPIUT | 18a  | Survey                            | Self-Report                                  | Multi-Screen<br>Composite<br>(Unspecified)       | Internet Browsing                                                                    | Online<br>Non-<br>Educational<br>Consumptive | Good                                                                             | Good                | Although the measure was primarily designed to be inserted in the ESPAD questionnaire, it may be used as a stand-alone measure since it has been properly validated. | Italian Version                                                               |  |
| Short Social Media Disorder Scale          |       | 100b | Survey                            | Self-Report                                  | Multi-Screen<br>Composite<br>(Unspecified)       | Social Media                                                                         | Sedentary<br>Online<br>Solitary<br>Shared    | Facebook<br>YouTube<br>Facebook<br>Messenger<br>WhatsApp<br>Instagram<br>Twitter | Good                | Good                                                                                                                                                                 | 9-item scale presents similar validity to the 27-item version.                |  |
| Smartphone Addiction Inventory             | SPAI  | 101  | Survey                            | Self-Report                                  | Cellphone/<br>Smartphone                         | Unknown/Unclear                                                                      | Non-<br>Educational<br>Consumptive           | Good                                                                             | Good                | Formatted a dichotomic version of the SPAI with internal consistency and a sensitivity comparable to the original version.                                           | Portuguese version                                                            |  |

## Measurement of Digital Media: A Scoping Review

24

|                                                  |        |        |             |                          |                             |                                                                                         |                   |          |      |                                                                                                                                                                                                                                                                           |                                                                                                                                                     |                                                  |
|--------------------------------------------------|--------|--------|-------------|--------------------------|-----------------------------|-----------------------------------------------------------------------------------------|-------------------|----------|------|---------------------------------------------------------------------------------------------------------------------------------------------------------------------------------------------------------------------------------------------------------------------------|-----------------------------------------------------------------------------------------------------------------------------------------------------|--------------------------------------------------|
|                                                  | 102    | Survey | Self-Report | Cellphone/<br>Smartphone | Unknown/Unclear             | Online<br>Offline<br>Non-<br>Educational<br>Consumptive                                 |                   | Good     | Good | Strong concurrent validity:<br>all correlations between the<br>SPAI-I factors and the IAT<br>total scores were significant<br>and congruent.<br><br>Four factors: compulsivity,<br>daily life interference,<br>craving, and sleep disorders.                              | Predominan<br>tly female<br>sample<br>population.<br><br>Sample<br>population<br>was<br>exclusively<br>university<br>undergradu<br>ate<br>students. |                                                  |
|                                                  | 103    | Survey | Self-Report | Cellphone/<br>Smartphone | General Mobile<br>Phone Use | Non-<br>Educational<br>Consumptive                                                      |                   | Good     | Good | Adequately translated and<br>adapted for use in Spain.<br><br>Does not collect information<br>on the type of mobile device<br>used.                                                                                                                                       |                                                                                                                                                     |                                                  |
|                                                  | 104    | Survey | Self-Report | Cellphone/<br>Smartphone | Unknown/Unclear             |                                                                                         |                   | Good     | Good | Validated in a mainland<br>Chinese sample.                                                                                                                                                                                                                                | Spanish<br>Version                                                                                                                                  |                                                  |
|                                                  | 105    | Survey | Self-Report | Cellphone/<br>Smartphone | Unknown/Unclear             | Online<br>Offline<br>Solitary<br>Shared<br>Productive<br>Consumptive                    |                   | Good     | Good | Brief measure.<br><br>Easy and accessible<br>administration.<br><br>Easily scored.<br><br>The scale does not accurately<br>capture the diagnostic<br>criteria for Smartphone<br>Addiction.                                                                                | Turkish<br>Version                                                                                                                                  |                                                  |
| Smartphone<br>Addiction Scale                    | SAS    | 106a   | Survey      | Self-Report              | Cellphone/<br>Smartphone    | Unknown/Unclear                                                                         | Sedentary         | Good     | Fair | Determined that the Arabic<br>versions of the SAS and<br>SAS-SV has strong<br>psychometric properties.<br><br>Some properties of the scale<br>could not be assessed due to<br>lack of comparable<br>instruments and no clinical<br>diagnosis for smartphone<br>addiction. | Arabic<br>Version<br><br>Predominan<br>tly female<br>sample<br>population.                                                                          |                                                  |
| Smartphone<br>Addiction Scale<br>- Short Version | SAS-SV | 72a    | Survey      | Self-Report              | Cellphone/<br>Smartphone    | Video Game<br>Social Media<br>Communication<br>(Texting/Video<br>Chatting)<br>TV/ Video | Online<br>Offline | Facebook | Good | Good                                                                                                                                                                                                                                                                      |                                                                                                                                                     | Predominan<br>tly female<br>sample<br>population |



## Measurement of Digital Media: A Scoping Review

25

|                                                                        |         |      |                                    |             | Streaming<br>Internet Browsing               |                             |                                                 |                                                                                  |                     |                                                                                                                                                                                                          |                                                                                                                            |
|------------------------------------------------------------------------|---------|------|------------------------------------|-------------|----------------------------------------------|-----------------------------|-------------------------------------------------|----------------------------------------------------------------------------------|---------------------|----------------------------------------------------------------------------------------------------------------------------------------------------------------------------------------------------------|----------------------------------------------------------------------------------------------------------------------------|
|                                                                        |         | 107  | Survey                             | Self-Report | Cellphone/<br>Smartphone                     | General Mobile<br>Phone Use | Sedentary<br>Non-<br>Educational<br>Consumptive | Good                                                                             | Fair                | Chinese<br>Version                                                                                                                                                                                       |                                                                                                                            |
|                                                                        |         | 106b | Survey                             | Self-Report | Cellphone/<br>Smartphone                     | Unknown/Unclear             | Sedentary                                       | Good                                                                             | Good                | Arabic<br>Version                                                                                                                                                                                        |                                                                                                                            |
|                                                                        |         | 108  | Survey                             | Self-Report | Cellphone/<br>Smartphone                     | Unknown/Unclear             | Online<br>Offline                               | Facebook<br>Twitter                                                              | Good                | Unknown<br>/Unclear                                                                                                                                                                                      | Scales had limited validity.<br>Sample<br>population<br>was<br>exclusively<br>college<br>students.                         |
| Social Media<br>Disorder Scale                                         | SMD     | 109  | Survey                             | Self-Report | Multi-Screen<br>Composite<br>(Unspecified)   | Social Media                | Online<br>Non-<br>Educational<br>Consumptive    | Good                                                                             | Good                | Successfully adapted the<br>Turkish version of the<br>SMDS to measure internet<br>and social media addiction in<br>adolescents.                                                                          | Turkish<br>Version                                                                                                         |
|                                                                        |         | 100a | Survey                             | Self-Report | Multi-Screen<br>Composite<br>(Unspecified)   | Social Media                | Sedentary<br>Online<br>Solitary<br>Shared       | Facebook<br>YouTube<br>Facebook<br>Messenger<br>WhatsApp<br>Instagram<br>Twitter | Good                | Good                                                                                                                                                                                                     |                                                                                                                            |
| Social<br>Networking<br>Activity<br>Intensity Scale                    | SNAIS   | 110  | Survey                             | Self-Report | Multi-Screen<br>Composition<br>(Unspecified) | Social Media                | Online                                          | Good                                                                             | Good                | Two constructs emerged: (1)<br>Social function, and (2)<br>Entertainment                                                                                                                                 |                                                                                                                            |
| Structured<br>Clinical<br>Interview for<br>Internet Gaming<br>Disorder | SCI-IGD | 111  | Survey<br>Structured<br>Interviews | Self-Report | Unknown/<br>Unclear                          | Video Game                  | Online<br>Non-<br>Educational<br>Consumptive    | Fair                                                                             | Good                | Psychometrically sound<br>interview tool to assess IGD<br>with greater precision than<br>the brief screening<br>questionnaire.                                                                           |                                                                                                                            |
| Student Laptop<br>Use and<br>Musculoskeletal<br>Posture                | SLUMP   | 112  | Survey                             | Self-Report | Laptop                                       | Unknown/Unclear             | Educational                                     | Unknown/<br>Unclear                                                              | Unknown<br>/Unclear | Many areas of measurement<br>for laptop use including<br>school, employment and<br>recreation.                                                                                                           |                                                                                                                            |
|                                                                        |         | 113  | Survey                             | Self-Report | Laptop                                       | Unknown/Unclear             | Educational                                     | Fair                                                                             | Unknown<br>/Unclear | First web-based instrument<br>to evaluate biomechanical<br>issues during laptop use.<br><br>Wording of questions may<br>have lacked clarity.<br>Questions may not have been<br>interpreted consistently. | More<br>relevant to<br>the<br>measureme<br>nt of<br>biomechani<br>cal issues<br>related to<br>device<br>usage.<br>However, |

## Measurement of Digital Media: A Scoping Review

26

|                                                             |       |     |                      |             |                                              |                                                                                                  |                                                |                                                   |                 |                                                                                                                                                                                  | some items are applicable to digital media usage.                                                                                                                                               |                                     |
|-------------------------------------------------------------|-------|-----|----------------------|-------------|----------------------------------------------|--------------------------------------------------------------------------------------------------|------------------------------------------------|---------------------------------------------------|-----------------|----------------------------------------------------------------------------------------------------------------------------------------------------------------------------------|-------------------------------------------------------------------------------------------------------------------------------------------------------------------------------------------------|-------------------------------------|
| Study of Cognition, Adolescents and Mobile Phones           | SCAMP | 114 | Survey               | Self-Report | Cellphone/ Smartphone Laptop Gaming Consoles | Unknown/Unclear                                                                                  | Online Offline Non-Educational Unknown/Unclear | Unknown/Unclear                                   | Unknown/Unclear | First study to assess the validity of mobile phone data collected separately for weekdays and weekends. Results showed difference in agreement between these assessment periods. |                                                                                                                                                                                                 |                                     |
| Technology-Related Psychological Consequences Questionnaire |       | 115 | Survey               | Self-Report | Cellphone/ Smartphone Laptop                 | Communication (Texting/Video Chatting) Internet Browsing                                         | Online Offline                                 | Fair                                              | Good            | Revision of the instrument to measure aspects of technology-related psychological changes.                                                                                       | Revised Version                                                                                                                                                                                 |                                     |
| Third-Person Effect Questionnaire & Media Exposure List     |       | 73  | Survey               | Self-Report | Unknown/Unclear                              | Unknown/Unclear                                                                                  |                                                | Unknown/Unclear                                   | Unknown/Unclear |                                                                                                                                                                                  |                                                                                                                                                                                                 |                                     |
|                                                             |       | 77b | Automated Statistics | Observation | Cellphone/ Smartphone                        | Social Media Communication (Texting/Video Chatting) TV/ Video Streaming Internet Browsing eBooks |                                                | Good                                              | Good            |                                                                                                                                                                                  | Objective Measure of Smartphone Use                                                                                                                                                             |                                     |
| Unnamed                                                     |       | 39a | Survey               | Self-Report | Unknown/Unclear                              | Internet Browsing                                                                                | Online                                         | Fair                                              | Fair            | Used an ordinal scale for frequency of internet use. Author(s) propose the use of a quantitative measure.                                                                        | Quantity-frequency measure of internet use                                                                                                                                                      |                                     |
|                                                             |       | 116 | Survey               | Self-Report | Cellphone/ Smartphone                        | Communication (Texting/Video Chatting) Social Media Internet Browsing                            | Online Offline Solitary Shared Educational     | Facebook Messenger WhatsApp Snapchat ooVoo Omegle | Unknown/Unclear | Poor                                                                                                                                                                             | Differences in frequency of use based on day of the week was not assessed. Future research should measure frequency on weekdays and weekends due to adolescent routines during the school week. | School-based survey of mobile usage |

## Measurement of Digital Media: A Scoping Review

27

|                                              |      |      |                         |                               |                                            | Chatroulette<br>Skout<br>6rounds                                                |                                                               |          |                     |                     |                                                                                                                                                                                                                                                                                           |                                                                                                                                                                                     |
|----------------------------------------------|------|------|-------------------------|-------------------------------|--------------------------------------------|---------------------------------------------------------------------------------|---------------------------------------------------------------|----------|---------------------|---------------------|-------------------------------------------------------------------------------------------------------------------------------------------------------------------------------------------------------------------------------------------------------------------------------------------|-------------------------------------------------------------------------------------------------------------------------------------------------------------------------------------|
|                                              |      | 117  | Survey                  | Self-Report                   | Cellphone/<br>Smartphone<br>Tablet         | TV/ Video<br>Streaming<br>Online Apps and<br>Games                              | Active<br>Sedentary<br>Productive<br>Consumptive              |          | Unknown/<br>Unclear | Unknown<br>/Unclear | Collects general information.<br>Would benefit from<br>collecting more specific<br>information such as types of<br>activities, types of videos<br>watched, etc.                                                                                                                           |                                                                                                                                                                                     |
|                                              |      | 118  | Survey                  | Self-Report                   | Cellphone/<br>Smartphone<br>Television     | Video Game<br>TV/ Video<br>Streaming<br>Internet Browsing                       |                                                               | Good     | Fair                |                     | Direct measure of violence<br>exposure                                                                                                                                                                                                                                                    |                                                                                                                                                                                     |
|                                              |      | 119  | Survey                  | Self-Report                   | Laptop<br>Gaming<br>Consoles               | Video Game<br>Communication<br>(Texting/Video<br>Chatting)<br>Internet Browsing | Online<br>Offline<br>Educational<br>Productive<br>Consumptive |          | Fair                | Poor                |                                                                                                                                                                                                                                                                                           |                                                                                                                                                                                     |
|                                              |      | 120  | Survey                  | Self-Report                   | Unknown/<br>Unclear                        | Unknown/Unclear                                                                 | Online<br>Non-<br>Educational<br>Consumptive                  | Facebook | Good                | Good                |                                                                                                                                                                                                                                                                                           | Screening<br>scale of<br>problematic<br>Internet<br>use.                                                                                                                            |
|                                              |      | 121  | Survey                  | Self-Report                   | Unknown/<br>Unclear                        | Video Game<br>TV/ Video<br>Streaming<br>General Computer<br>Use                 | Sedentary<br>Non-<br>Educational                              |          | Fair                | Fair                | Indicators of screen time<br>might not have captured all<br>screen-based activities.<br>Author(s) note that future<br>researchers should ensure<br>that the measure reflects<br>screen-based devices used at<br>that time due to the<br>constantly changing<br>technological environment. | Substudy of<br>a comprehens<br>ive<br>population<br>survey<br>titled<br>"Brazilian<br>Guide of<br>Evaluation<br>of Health-<br>Related<br>Physical<br>Fitness and<br>Life<br>Habits" |
|                                              |      | 123a | Survey                  | Self-Report                   | Cellphone/<br>Smartphone                   | Communication<br>(Texting/Video<br>Chatting)                                    |                                                               | WhatsApp | Fair                | Unknown<br>/Unclear |                                                                                                                                                                                                                                                                                           |                                                                                                                                                                                     |
| Videogame<br>Addiction Scale<br>for Children | VASC | 122  | Survey                  | Self-Report                   | Multi-Screen<br>Composite<br>(Unspecified) | Video Game                                                                      |                                                               |          | Good                | Good                | Four-factor structure.                                                                                                                                                                                                                                                                    |                                                                                                                                                                                     |
| XMobiSense                                   |      | 123b | Automated<br>Statistics | Passive<br>Data<br>Collection | Cellphone/<br>Smartphone                   | Communication<br>(Texting/Video<br>Chatting)                                    |                                                               | WhatsApp | Unknown/<br>Unclear | Unknown<br>/Unclear | Collects data on number and<br>frequency of voice calls, in<br>addition to laterality and<br>hands-free usage.                                                                                                                                                                            |                                                                                                                                                                                     |

## Measurement of Digital Media: A Scoping Review

28

|                                                      |         |     |        |                                |                                                                                    |                                                           |                                                                            |      |      |                                                                                                                                          |
|------------------------------------------------------|---------|-----|--------|--------------------------------|------------------------------------------------------------------------------------|-----------------------------------------------------------|----------------------------------------------------------------------------|------|------|------------------------------------------------------------------------------------------------------------------------------------------|
| Young Diagnostic Questionnaire                       | YDQ     | 124 | Survey | Self-Report                    | Multi-Screen Composite (Unspecified)                                               | Internet Browsing                                         | Online Consumptive                                                         | Fair | Good | Unidimensional measure that offers less information than other assessments.                                                              |
|                                                      |         | 125 | Survey | Mother-Report<br>Father-Report | Multi-Screen Composite (Unspecified)                                               | Internet Browsing                                         | Online                                                                     | Fair | Good |                                                                                                                                          |
| Young's Internet Addiction Test - Short Form         | YIAT-SF | 56b | Survey | Self-Report                    | Unknown/<br>Unclear                                                                | Video Game                                                | Online<br>Offline<br>Consumptive                                           | Fair | Good |                                                                                                                                          |
| Youth Leisure-Time Sedentary Behaviour Questionnaire | YLSBQ   | 126 | Survey | Self-Report                    | Laptop<br>Television<br>Gaming<br>Consoles<br>Multi-Screen Composite (Unspecified) | Video Game<br>TV/ Video<br>Streaming<br>Internet Browsing | Sedentary<br>Online<br>Offline<br>Educational<br>Productive<br>Consumptive | Good | Fair | Moderate to good test-retest reliability.<br><br>Moderate validity, similar or better than previous versions adapted to this population. |
