# Supplementary material
Source: HighWire-hosted journal article supplement (https://bmjopen.bmj.com/content/11/5/e046367)
Supplement: inline-supplementary-material-3 [file inline-supplementary-material-3.pdf]

## Measurement of Digital Media: A Scoping Review

29

## Appendix C – Grey Literature Sources

Table 1. Study Characteristics – Grey Literature

| Measurement Tool                                                              | Source # | Authors (Year)                   | Study Setting   | Total Sample Size | Sample Age Group(s)                                    | Race                                   | SES - Index                      | Study Paradigm  | Risk of Bias |
|-------------------------------------------------------------------------------|----------|----------------------------------|-----------------|-------------------|--------------------------------------------------------|----------------------------------------|----------------------------------|-----------------|--------------|
| EU Kids Online 2017                                                           | 1        | EU Kids Online (2017)            | Unknown/Unclear | Unknown           | School Age<br>Adolescence<br>Young Adults              | Unknown                                | Not Specified                    | Survey (Local)  | Moderate     |
| January 2018 Core Trends Survey                                               | 2        | Smith & Anderson (2018)          | In-Home         | 2002              | Young Adults                                           | Unknown                                | Not Specified                    | National Survey | Low          |
| 2018 PEW Research Center's Parent Survey                                      | 3a       | Jiang (2018)                     | In-Home, Online | 1058              | Adolescence                                            | Unknown                                | Not Specified                    | National Survey | Low          |
| 2018 PEW Research Center's Teen Survey                                        | 3b       | Jiang (2018)                     | In-Home, Online | 743               | Adolescence                                            | Unknown                                | Not Specified                    | National Survey | Low          |
|                                                                               | 4        | Anderson & Jiang (2018)          | In-Home, Online | 1801              | Adolescence                                            | Unknown                                | Diverse SES – Author's Scale     | National Survey | Low          |
| 2018 PEW Research Center's American Trends Panel                              | 5        | Smith, Toor, & van Kessel (2018) | In-Home         | 4594              | Infancy<br>Preschool Age<br>School Age<br>Young Adults | Unknown                                | Not Specified                    | National Survey | Low          |
| Screens and Sleep Child Questionnaire                                         | 6a       | Robb (2019)                      | In-Home, Online | 1000              | School Age<br>Adolescence<br>Young Adults              | Unknown                                | Diverse SES – Author's Scale     | National Survey | Low          |
| Screens and Sleep Parent Questionnaire                                        | 6b       | Robb (2019)                      | In-Home, Online | 1000              | School Age<br>Adolescence<br>Young Adults              | 64% White<br>17% Hispanic<br>12% Black | Diverse SES – Author's Scale     | National Survey | Low          |
| Social Media, Social Life Survey 2018                                         | 7        | Rideout & Robb (2018)            | Online          | 1141              | Adolescence                                            | 54% White<br>23% Hispanic<br>14% Black | Diverse SES – Author's Scale     | National Survey | Low          |
| The Common Sense Census: Media Use by Kids Zero to Eight Questionnaire        | 8        | Common Sense Media (2017)        | Online          | 1454              | Infancy<br>Preschool Age<br>School Age                 | 56% White<br>23% Hispanic<br>11% Black | Diverse SES – Author's Scale     | National Survey | Low          |
| The Common Sense Census: Media Use by Tweens and Teens Questionnaire          | 9        | Rideout & Robb (2019)            | Online          | 1677              | School Age<br>Adolescence<br>Young Adults              | 52% White<br>25% Hispanic<br>14% Black | High/Middle SES – Author's Scale | National Survey | Low          |
|                                                                               | 10       | Common Sense Media (2015)        | Online          | 2658              | School Age<br>Adolescence<br>Young Adults              | 54% White<br>23% Hispanic<br>13% Black | High/Middle SES – Author's Scale | National Survey | Low          |
| The Common Sense Census: Plugged-in Parents of Tweens and Teens Questionnaire | 11       | Lauricella et al. (2016)         | Online          | 1786              | School Age<br>Adolescence<br>Young Adults              | Unknown                                | Diverse SES – Author's Scale     | National Survey | Low          |
| The Digital Well-Being of Canadian Families Survey                            | 12       | Brisson-Boivin (2018)            | Online          | 825               | Infancy<br>Preschool Age<br>School Age<br>Adolescence  | Unknown                                | Diverse SES – Author's Scale     | National Survey | Low          |

## Measurement of Digital Media: A Scoping Review

30

|                                                                                   |     |                                |         |      |                          |         |                              |                 |     |
|-----------------------------------------------------------------------------------|-----|--------------------------------|---------|------|--------------------------|---------|------------------------------|-----------------|-----|
| The New Normal: Parents, Teens, and Mobile Devices in Mexico Child Questionnaire  | 13a | Robb, Bay, & Vennegaard (2019) | Online  | 1226 | Adolescence Young Adults | Unknown | Diverse SES – Common Index   | National Survey | Low |
| The New Normal: Parents, Teens, and Mobile Devices in Mexico Parent Questionnaire | 13b | Robb, Bay, & Vennegaard (2019) | Online  | 1226 | Adolescence Young Adults | Unknown | Diverse SES – Common Index   | National Survey | Low |
| Unnamed                                                                           | 14  | Duggan (2015)                  | In-Home | 1907 | Young Adults             | Unknown | Diverse SES – Author's Scale | National Survey | Low |

## Measurement of Digital Media: A Scoping Review

31

Table 2. Digital Media Use Measurement Tool Characteristics – Grey Literature

| Measurement Tool                                 | Source # | Measurement Type | Informant                    | Digital Media Device                                                                                    | Media Type                                                                                                            | Usage Characteristics                                         | Specific Applications/ Websites                                                              | Reliability         | Validity            | Author Identified Tool Strengths/Limitations |
|--------------------------------------------------|----------|------------------|------------------------------|---------------------------------------------------------------------------------------------------------|-----------------------------------------------------------------------------------------------------------------------|---------------------------------------------------------------|----------------------------------------------------------------------------------------------|---------------------|---------------------|----------------------------------------------|
| EU Kids Online 2017                              | 1        | Survey           | Self-Report                  | Cellphone/Smartphone<br>Laptop<br>Tablet<br>Television<br>Gaming<br>Consoles<br>Wearables<br>Smart Toys | Video Game<br>Social Media<br>Communication<br>(Texting/Video Chatting)<br>TV/Video<br>Streaming<br>Internet Browsing | Active<br>Sedentary<br>Online<br>Productive<br>Consumptive    | Facebook<br>Snapchat<br>Instagram<br>Twitter                                                 | Unknown/<br>Unclear | Unknown/<br>Unclear | Not reported                                 |
| January 2018 Core Trends Survey                  | 2        | Survey           | Self-Report                  | Cellphone/Smartphone<br>Multi-Screen Composite<br>(Unspecified)                                         | Social Media<br>TV/Video<br>Streaming<br>Internet Browsing                                                            | Online<br>Offline                                             | Facebook<br>YouTube<br>WhatsApp<br>Snapchat<br>Instagram<br>Twitter<br>LinkedIn<br>Pinterest | Unknown/<br>Unclear | Unknown/<br>Unclear | Not reported                                 |
| 2018 PEW Research Center's Parent Survey         | 3a       | Survey           | Parent-Report                | Cellphone/Smartphone<br>Multi-Screen Composite<br>(Unspecified)                                         | Video Game<br>Social Media<br>Communication<br>(Texting/Video Chatting)<br>Internet Browsing                          | Online<br>Offline                                             | Unknown/<br>Unclear                                                                          | Unknown/<br>Unclear | Unknown/<br>Unclear | Not reported                                 |
| 2018 PEW Research Center's Teen Survey           | 3b       | Survey           | Self-Report                  | Cellphone/Smartphone<br>Multi-Screen Composite<br>(Unspecified)                                         | Video Game<br>Social Media<br>Communication<br>(Texting/Video Chatting)<br>Internet Browsing                          | Online<br>Offline                                             | Unknown/<br>Unclear                                                                          | Unknown/<br>Unclear | Unknown/<br>Unclear | Not reported                                 |
|                                                  | 4        | Survey           | Self-Report                  | Cellphone/Smartphone<br>Laptop<br>Gaming<br>Console                                                     | Video Game<br>Social Media                                                                                            | Online<br>Offline<br>Educational<br>Productive<br>Consumptive | Facebook<br>YouTube<br>Snapchat<br>Instagram<br>Twitter<br>Tumblr<br>Reddit                  | Unknown/<br>Unclear | Unknown/<br>Unclear | Not reported                                 |
| 2018 PEW Research Center's American Trends Panel | 5        | Survey           | Self-Report<br>Parent-Report | Unknown/Unclear                                                                                         | TV/Video<br>Streaming                                                                                                 | Online<br>Productive<br>Consumptive                           | YouTube                                                                                      | Unknown/<br>Unclear | Unknown/<br>Unclear | Not reported                                 |
| Screens and Sleep Child Questionnaire            | 6a       | Survey           | Self-Report                  | Cellphone/Smartphone                                                                                    | Video Game<br>Social Media                                                                                            | Online<br>Offline<br>Productive                               | Unknown/<br>Unclear                                                                          | Unknown/<br>Unclear | Unknown/<br>Unclear | Not reported                                 |

## Measurement of Digital Media: A Scoping Review

32

|                                                                                       |    |        |                                                 |                                                                                                                                                                                                                         |                                                                                                                                                                                                            |                                                               |                                                                                                                                 |                     |                      |              |
|---------------------------------------------------------------------------------------|----|--------|-------------------------------------------------|-------------------------------------------------------------------------------------------------------------------------------------------------------------------------------------------------------------------------|------------------------------------------------------------------------------------------------------------------------------------------------------------------------------------------------------------|---------------------------------------------------------------|---------------------------------------------------------------------------------------------------------------------------------|---------------------|----------------------|--------------|
|                                                                                       |    |        |                                                 | Communication<br>(Texting/Video<br>Chatting)<br>TV/Video<br>Streaming<br>Internet Browsing                                                                                                                              | Consumptive                                                                                                                                                                                                |                                                               |                                                                                                                                 |                     |                      |              |
| Screens and<br>Sleep Parent<br>Questionnaire                                          | 6b | Survey | Mother-Report<br>Father-Report<br>Parent-Report | Cellphone/Sm<br>artphone                                                                                                                                                                                                | Video Game<br>Social Media<br>Communication<br>(Texting/Video<br>Chatting)<br>TV/Video<br>Streaming<br>Internet Browsing                                                                                   | Online<br>Offline<br>Productive<br>Consumptive                | Unknown/<br>Unclear                                                                                                             | Unknown/<br>Unclear | Unknown<br>/ Unclear | Not reported |
| Social Media,<br>Social Life<br>Survey 2018                                           | 7  | Survey | Self-Report                                     | Cellphone/Sm<br>artphone<br>Laptop<br>Tablet                                                                                                                                                                            | Social Media<br>Communication<br>(Texting/Video<br>Chatting)                                                                                                                                               | Online<br>Offline                                             | Facebook<br>Snapchat<br>Instagram<br>Twitter<br>Tumblr<br>Reddit                                                                | Unknown/<br>Unclear | Unknown<br>/ Unclear | Not reported |
| The Common<br>Sense Census:<br>Media Use by<br>Kids Zero to<br>Eight<br>Questionnaire | 8  | Survey | Parent-Report                                   | Cellphone/Sm<br>artphone<br>Laptop<br>Tablet<br>Television<br>Gaming<br>Consoles<br>Digital<br>Assistants<br>DVD Player<br>Virtual<br>Reality<br>Headset<br>e-Readers<br>Educational<br>Gaming<br>Devices<br>Smart Toys | Video Game<br>Social Media<br>Communication<br>(Texting/Video<br>Chatting)<br>TV/Video<br>Streaming<br>Internet Browsing<br>eBooks<br>Virtual/Augmente<br>d Reality<br>Using Apps<br>Take<br>Photos/Videos | Online<br>Offline<br>Educational<br>Productive<br>Consumptive | YouTube<br>Instagram<br>Snapchat<br>Netflix<br>Amazon<br>Prime<br>Hulu<br>Musical.ly<br>Club Penguin<br>Minecraft<br>Animal Jam | Unknown/<br>Unclear | Unknown<br>/ Unclear | Not reported |
| The Common<br>Sense Census:<br>Media Use by<br>Tweens and<br>Teens<br>Questionnaire   | 9  | Survey | Self-Report                                     | Cellphone/Sm<br>artphone<br>Laptop<br>Tablet<br>Television<br>Gaming<br>Consoles<br>Digital<br>Assistants<br>Wearables                                                                                                  | Video Game<br>Social Media<br>Communication<br>(Texting/Video<br>Chatting)<br>TV/Video<br>Streaming<br>Internet Browsing<br>eBooks<br>Virtual/Augmente<br>d Reality<br>Music                               | Online<br>Offline<br>Educational<br>Productive<br>Consumptive | Unknown/<br>Unclear                                                                                                             | Unknown/<br>Unclear | Unknown<br>/ Unclear | Not reported |

## Measurement of Digital Media: A Scoping Review

33

|                                                                               |     |        | Virtual Reality Headset e-Readers | Writing Creating Art Shopping Coding Using Apps                                                                                                                                        |                                                                                                                                                                     |                                                                                     |                 |                 |                 |              |
|-------------------------------------------------------------------------------|-----|--------|-----------------------------------|----------------------------------------------------------------------------------------------------------------------------------------------------------------------------------------|---------------------------------------------------------------------------------------------------------------------------------------------------------------------|-------------------------------------------------------------------------------------|-----------------|-----------------|-----------------|--------------|
|                                                                               | 10  | Survey | Self-Report                       | Cellphone/Smartphone<br>Laptop<br>Tablet<br>Television<br>Gaming<br>Consoles<br>Portable<br>Game Players<br>Portable<br>Music Players<br>e-Readers                                     | Video Game<br>Social Media<br>Communication (Texting/Video Chatting)<br>TV/Video<br>Streaming<br>Internet Browsing<br>eBooks<br>Music<br>Creating Art<br>Using Apps | Online<br>Offline<br>Educational<br>Productive<br>Consumptive                       | Unknown/Unclear | Unknown/Unclear | Unknown/Unclear | Not reported |
| The Common Sense Census: Plugged-in Parents of Tweens and Teens Questionnaire | 11  | Survey | Parent-Report                     | Cellphone/Smartphone<br>Laptop<br>Tablet<br>Television<br>Gaming<br>Consoles<br>Portable<br>Game Players<br>e-Readers                                                                  | Video Game<br>Social Media<br>Communication (Texting/Video Chatting)<br>TV/Video<br>Streaming<br>Internet Browsing<br>Music<br>Working/School                       | Online<br>Offline<br>Educational<br>Productive<br>Consumptive                       | Unknown/Unclear | Unknown/Unclear | Unknown/Unclear | Not reported |
| The Digital Well-Being of Canadian Families Survey                            | 12  | Survey | Parent-Report                     | Cellphone/Smartphone<br>Laptop<br>Tablet<br>Television<br>Gaming<br>Consoles<br>Digital Assistants<br>Virtual Reality Headset<br>e-Readers<br>Educational Gaming Devices<br>Smart Toys | Video Game<br>Social Media<br>Communication (Texting/Video Chatting)<br>TV/Video<br>Streaming<br>Internet Browsing<br>eBooks                                        | Online<br>Offline<br>Solitary<br>Shared<br>Educational<br>Productive<br>Consumptive | Unknown/Unclear | Unknown/Unclear | Unknown/Unclear | Not reported |
| The New Normal: Parents, Teens, and Mobile Devices in                         | 13a | Survey | Self-Report                       | Unknown/Unclear                                                                                                                                                                        | Video Game<br>Social Media<br>Communication (Texting/Video Chatting)                                                                                                | Online<br>Offline<br>Educational<br>Productive<br>Consumptive                       | Unknown/Unclear | Unknown/Unclear | Unknown/Unclear | Not reported |

## Measurement of Digital Media: A Scoping Review

34

|                                                                                   |     |        |                     |                                            |                                                                                                                          |                                                               |                                                                                                                                                       |                 |                 |              |
|-----------------------------------------------------------------------------------|-----|--------|---------------------|--------------------------------------------|--------------------------------------------------------------------------------------------------------------------------|---------------------------------------------------------------|-------------------------------------------------------------------------------------------------------------------------------------------------------|-----------------|-----------------|--------------|
| Mexico Child Questionnaire                                                        |     |        |                     | TV/Video<br>Streaming<br>Internet Browsing |                                                                                                                          |                                                               |                                                                                                                                                       |                 |                 |              |
| The New Normal: Parents, Teens, and Mobile Devices in Mexico Parent Questionnaire | 13b | Survey | Joint Parent-Report | Unknown/Unclear                            | Video Game<br>Social Media<br>Communication<br>(Texting/Video<br>Chatting)<br>TV/Video<br>Streaming<br>Internet Browsing | Online<br>Offline<br>Educational<br>Productive<br>Consumptive | Unknown/Unclear                                                                                                                                       | Unknown/Unclear | Unknown/Unclear | Not reported |
| Unnamed                                                                           | 14  | Survey | Self-Report         | Cellphone/Smartphone                       | Social Media<br>Communication<br>(Texting/Video<br>Chatting)                                                             | Online<br>Offline                                             | Facebook<br>WhatsApp<br>Snapchat<br>Instagram<br>Twitter<br>LinkedIn<br>Pinterest<br>Tumblr<br>Reddit<br>Digg<br>Slashdot<br>Kik<br>Wickr<br>iMessage | Unknown/Unclear | Unknown/Unclear | Not reported |
